# Supplementary material for: Brazilian Atmospheric Inventories – BRAIN: A comprehensive database of air quality in Brazil
Source: Copernicus journal article supplement (doi:10.5194/essd-2023-305), 2023-10-05
Supplement: Supplementary file 1 [file essd-2023-305-supplement.zip]

## Supplementary Material 2

**Table SM2.** Chemical species in biogenic emission inventory.

| Variable           | Description                                         | Unit             |
|--------------------|-----------------------------------------------------|------------------|
| TFLAG              | Time flag for model outputs.                        | <YYYYDDD,HHMMSS> |
| ISOP               | Isoprene (C <sub>5</sub> H <sub>8</sub> ).          | mol/s            |
| TERP               | Total terpenes.                                     | mol/s            |
| PAR                | Paraffinic hydrocarbons (alkanes).                  | mol/s            |
| XYL                | Xylenes (C <sub>8</sub> H <sub>10</sub> ).          | mol/s            |
| OLE                | Olefins.                                            | mol/s            |
| NR                 | Nitrate radical (NO <sub>3</sub> ).                 | mol/s            |
| MEOH               | Methanol (CH <sub>3</sub> OH).                      | mol/s            |
| CH <sub>4</sub>    | Methane (CH <sub>4</sub> ).                         | mol/s            |
| NH <sub>3</sub>    | Ammonia (NH <sub>3</sub> ).                         | mol/s            |
| NO                 | Nitric oxide (NO).                                  | mol/s            |
| ALD2               | Acetaldehyde (C <sub>2</sub> H <sub>4</sub> O).     | mol/s            |
| ETOH               | Ethanol (C <sub>2</sub> H <sub>5</sub> OH).         | mol/s            |
| FORM               | Formaldehyde (CH <sub>2</sub> O).                   | mol/s            |
| ALDX               | Aldehydes.                                          | mol/s            |
| TOL                | Toluene (C <sub>7</sub> H <sub>8</sub> ).           | mol/s            |
| IOLE               | Isoprene oxide.                                     | mol/s            |
| CO                 | Carbon monoxide (CO).                               | mol/s            |
| ETHA               | Ethoxyethane (C <sub>2</sub> H <sub>6</sub> O).     | mol/s            |
| ETH                | Ethene (ethylene) (C <sub>2</sub> H <sub>4</sub> ). | mol/s            |
| ETHY               | Ethylene (C <sub>2</sub> H <sub>4</sub> ).          | mol/s            |
| PRPA               | Propane (C <sub>3</sub> H <sub>8</sub> ).           | mol/s            |
| BENZ               | Benzene (C <sub>6</sub> H <sub>6</sub> ).           | mol/s            |
| ACET               | Acetone (C <sub>3</sub> H <sub>6</sub> O).          | mol/s            |
| KET                | Ketones.                                            | mol/s            |
| AACD               | Acetic acid.                                        | mol/s            |
| FACD               | Formic acid.                                        | mol/s            |
| HCN                | Hydrogen cyanide (HCN).                             | mol/s            |
| ISPD               | Isoprene peroxy radicals.                           | mol/s            |
| N <sub>2</sub> O   | Nitrous oxide (N <sub>2</sub> O).                   | mol/s            |
| SQT                | Squalene.                                           | mol/s            |
| TRS                | Total reduced sulfur.                               | mol/s            |
| CH <sub>3</sub> BR | Methyl bromide (CH <sub>3</sub> Br).                | mol/s            |
| CH <sub>3</sub> CL | Methyl chloride (CH <sub>3</sub> Cl).               | mol/s            |
| CH <sub>3</sub> I  | Methyl iodide (CH <sub>3</sub> I).                  | mol/s            |

**Table SM2.** Chemical species in industrial emission inventory.

| Variable     | Description                                             | Unit             |
|--------------|---------------------------------------------------------|------------------|
| TFLAG        | Time flag for model outputs.                            | <YYYYDDD,HHMMSS> |
| ACET         | Acetone (C <sub>3</sub> H <sub>6</sub> O).              | moles/s          |
| ACROLEIN     | Acrolein (C <sub>3</sub> H <sub>4</sub> O).             | moles/s          |
| ALD2         | Acetaldehyde (C <sub>2</sub> H <sub>4</sub> O).         | moles/s          |
| ALD2_PRIMARY | Primary acetaldehyde (C <sub>2</sub> H <sub>4</sub> O). | moles/s          |
| BENZ         | Benzene (C <sub>6</sub> H <sub>6</sub> ).               | moles/s          |
| BUTADIENE13  | 1,3-Butadiene (C <sub>4</sub> H <sub>6</sub> ).         | moles/s          |
| CH4          | Methane (CH <sub>4</sub> ).                             | moles/s          |
| CH4_INV      | Inventory methane (CH <sub>4</sub> ).                   | g/s              |
| ETH          | Ethene (ethylene) (C <sub>2</sub> H <sub>4</sub> ).     | moles/s          |
| ETHA         | Ethoxyethane (C <sub>2</sub> H <sub>6</sub> O).         | moles/s          |
| ETHY         | Ethylene (C <sub>2</sub> H <sub>4</sub> ).              | moles/s          |
| ETOH         | Ethanol (C <sub>2</sub> H <sub>5</sub> OH).             | moles/s          |
| FORM         | Formaldehyde (CH <sub>2</sub> O).                       | moles/s          |
| FORM_PRIMARY | Primary formaldehyde (CH <sub>2</sub> O).               | moles/s          |
| ISO          | Isoprene (C <sub>5</sub> H <sub>8</sub> ).              | moles/s          |
| KET          | Ketones.                                                | moles/s          |
| MEOH         | Methanol (CH <sub>3</sub> OH).                          | moles/s          |
| NAPH         | Naphthalene (C <sub>10</sub> H <sub>8</sub> ).          | moles/s          |
| PAL          | Particulate Aliphatic Carbon.                           | g/s              |
| PCA          | Particulate Carboxylic Acid.                            | g/s              |
| PCL          | Particulate Chloride (Cl).                              | g/s              |
| PEC          | Particulate Elemental Carbon.                           | g/s              |
| PFE          | Particulate Fe.                                         | g/s              |
| PK           | Particulate Potassium (K).                              | g/s              |
| PMG          | Particulate Mg.                                         | g/s              |
| PMN          | Particulate Mn.                                         | g/s              |
| PNA          | Particulate Na.                                         | g/s              |
| PNH4         | Particulate Ammonium (NH <sub>4</sub> ).                | g/s              |
| PNO3         | Particulate Nitrate (NO <sub>3</sub> ).                 | g/s              |
| PRPA         | Propane (C <sub>3</sub> H <sub>8</sub> ).               | moles/s          |
| PSI          | Particulate Si.                                         | g/s              |
| PSO4         | Particulate Sulfate (SO <sub>4</sub> ).                 | g/s              |
| PTI          | Particulate Ti.                                         | g/s              |
| TOL          | Toluene (C <sub>7</sub> H <sub>8</sub> ).               | moles/s          |
| XYLMN        | Xylene (C <sub>8</sub> H <sub>10</sub> ).               | moles/s          |
| CO           | Carbon Monoxide (CO).                                   | moles/s          |
| SO2          | Sulfur Dioxide (SO <sub>2</sub> ).                      | moles/s          |

|         |                                              |         |
|---------|----------------------------------------------|---------|
| VOC_INV | Inventory volatile organic compounds (VOCs). | moles/s |
| PMC     | Particulate Matter Carbon.                   | g/s     |
| NO      | Nitric Oxide (NO).                           | moles/s |
| NO2     | Nitrogen Dioxide (NO2).                      | moles/s |

**Table SM2.** Chemical species in biomass burning emission inventory.

| Variable | Description                        | Unit             |
|----------|------------------------------------|------------------|
| CO       | Carbon Monoxide (CO).              | moles/s          |
| NO       | Nitric Oxide (NO).                 | moles/s          |
| NO2      | Nitrogen Dioxide (NO2).            | moles/s          |
| SO2      | Sulfur Dioxide (SO2).              | moles/s          |
| NH3      | Ammonia (NH3).                     | moles/s          |
| ECH4     | Ethane (C2H6).                     | moles/s          |
| ACET     | Acetone (C3H6O).                   | moles/s          |
| ALD2     | Acetaldehyde (C2H4O).              | moles/s          |
| BENZENE  | Benzene (C6H6).                    | moles/s          |
| PAR      | Paraffinic hydrocarbons (alkanes). | moles/s          |
| ETHY     | Ethylene (C2H4).                   | moles/s          |
| ETHE     | Ethyl ethanoate.                   | moles/s          |
| ETHA     | Ethoxyethane (C2H6O).              | moles/s          |
| PRPA     | Propane (C3H8).                    | moles/s          |
| FORM     | Formaldehyde (CH2O).               | moles/s          |
| GLY      | Glycol (C2H6O2).                   | moles/s          |
| GLYC     | Glycerol (C3H8O3).                 | moles/s          |
| HAC      | Acetic Acid (C2H4O2).              | moles/s          |
| MGLY     | Methylglyoxal (C3H4O2).            | moles/s          |
| KET      | Ketones.                           | moles/s          |
| IOLE     | Isoprene (C5H8).                   | moles/s          |
| TOL      | Toluene (C7H8).                    | moles/s          |
| XYL      | Xylenes (C8H10).                   | moles/s          |
| POC      | Particulate Organic Carbon.        | g/s              |
| PEC      | Particulate Elemental Carbon.      | g/s              |
| PSO4     | Particulate Sulfate (SO4).         | g/s              |
| PNO3     | Particulate Nitrate (NO3).         | g/s              |
| PMOTHR   | Particulate Matter Unspecified.    | g/s              |
| TFLAG    | Time flag for model outputs.       | <YYYYDDD,HHMMSS> |

**Table SM2.** Chemical species in vehicular emission inventory.

| Variable     | Description                       | Unit             |
|--------------|-----------------------------------|------------------|
| TFLAG        | Time flag.                        | <YYYYDDD,HHMMSS> |
| ACET         | Acetaldehyde.                     | moles/s          |
| ACROLEIN     | Acrolein.                         | moles/s          |
| ALD2         | Acetaldehyde (secondary).         | moles/s          |
| ALD2_PRIMARY | Acetaldehyde (primary).           | moles/s          |
| ALDX         | Aldehydes.                        | moles/s          |
| BENZ         | Benzene.                          | moles/s          |
| BUTADIENE13  | 1,3-Butadiene.                    | moles/s          |
| CH4          | Methane.                          | moles/s          |
| CH4_INV      | Inverted methane.                 | g/s              |
| CL2          | Chlorine.                         | moles/s          |
| CO           | Carbon monoxide.                  | moles/s          |
| CO2_INV      | Inverted carbon dioxide.          | g/s              |
| ETH          | Ethane.                           | moles/s          |
| ETHA         | Ethane (secondary).               | moles/s          |
| ETHY         | Ethane (primary).                 | moles/s          |
| ETOH         | Ethanol.                          | moles/s          |
| FORM         | Formaldehyde.                     | moles/s          |
| FORM_PRIMARY | Formaldehyde (primary).           | moles/s          |
| HCL          | Hydrogen chloride.                | moles/s          |
| HONO         | Nitrous acid.                     | moles/s          |
| IOLE         | Isoprene oxidation products.      | moles/s          |
| ISOP         | Isoprene.                         | moles/s          |
| KET          | Ketones.                          | moles/s          |
| MEOH         | Methanol.                         | moles/s          |
| N2O_INV      | Inverted nitrous oxide.           | g/s              |
| NAPH         | Naphthalene.                      | moles/s          |
| NH3          | Ammonia.                          | moles/s          |
| NH3_FERT     | Ammonia from fertilizer.          | moles/s          |
| NO           | Nitric oxide.                     | moles/s          |
| NO2          | Nitrogen dioxide.                 | moles/s          |
| NVOL         | Nonvolatile organic compound.     | moles/s          |
| OLE          | Olefins.                          | moles/s          |
| PAL          | Pals.                             | g/s              |
| PAR          | Paraffins.                        | moles/s          |
| PCA          | Polycyclic aromatic hydrocarbons. | g/s              |
| PCL          | Primary organic carbon.           | g/s              |
| PEC          | Primary elemental carbon.         | g/s              |
| PFE          | Primary fine elemental carbon.    | g/s              |

|         |                                          |         |
|---------|------------------------------------------|---------|
| PH2O    | Water vapor pressure.                    | g/s     |
| PK      | Black carbon.                            | g/s     |
| PMC     | Primary organic matter carbon.           | g/s     |
| PMG     | Primary organic mass.                    | g/s     |
| PMN     | Primary organic nitrogen.                | g/s     |
| PMOTHR  | Other primary particulate matter.        | g/s     |
| PNA     | Primary organic nitrogen aerosol.        | g/s     |
| PNCOM   | Nonmethane organic aerosol.              | g/s     |
| PNH4    | Ammonium nitrate.                        | g/s     |
| PNO3    | Nitrate organic aerosol.                 | g/s     |
| POC     | Particulate organic carbon.              | g/s     |
| PRPA    | PrPA.                                    | moles/s |
| PSI     | Psiloxanes.                              | g/s     |
| PSO4    | Sulfate.                                 | g/s     |
| PTI     | Primary transition inorganic aerosol.    | g/s     |
| SO2     | Sulfur dioxide.                          | moles/s |
| SOAALK  | Secondary organic aerosol (alkanes).     | moles/s |
| SULF    | Sulfates.                                | moles/s |
| TERP    | Terpenes.                                | moles/s |
| TOL     | Toluene.                                 | moles/s |
| UNK     | Unknown.                                 | moles/s |
| UNR     | Unresolved.                              | moles/s |
| VOC_INV | Inverted volatile organic compound.      | g/s     |
| XYLMN   | Xylene (methyl ethyl and methyl propyl). | moles/s |
| PMFINE  | Fine particulate matter.                 | g/s     |
