# Supplementary material for: Brazilian Atmospheric Inventories – BRAIN: A comprehensive database of air quality in Brazil
Source: Copernicus journal article supplement (doi:10.5194/essd-2023-305), 2023-10-05
Supplement: Supplementary file 3 [file essd-2023-305-supplement.zip]

## Supplementary Material 6

**Table SM6.** Variable, description, and unit of CMAQ outputs.

| Variable | Description                                           | Unit                 |
|----------|-------------------------------------------------------|----------------------|
| TFLAG    | Time flag indicator for model outputs                 | <YYYYDDD,HHM<br>MSS> |
| NO2      | Nitrogen dioxide (NO <sub>2</sub> )                   | ppmV                 |
| NO       | Nitric oxide (NO)                                     | ppmV                 |
| O        | Atomic oxygen (O)                                     | ppmV                 |
| O3       | Ozone (O <sub>3</sub> )                               | ppmV                 |
| NO3      | Nitrate radical (NO <sub>3</sub> )                    | ppmV                 |
| O1D      | Excited state oxygen (O1D)                            | ppmV                 |
| OH       | Hydroxyl radical (OH)                                 | ppmV                 |
| HO2      | Hydroperoxyl radical (HO <sub>2</sub> )               | ppmV                 |
| H2O2     | Hydrogen peroxide (H <sub>2</sub> O <sub>2</sub> )    | ppmV                 |
| N2O5     | Dinitrogen pentoxide (N <sub>2</sub> O <sub>5</sub> ) | ppmV                 |
| HNO3     | Nitric acid (HNO <sub>3</sub> )                       | ppmV                 |
| HONO     | Nitrous acid (HONO)                                   | ppmV                 |
| PNA      | Polynuclear aromatic hydrocarbons (PNA)               | ppmV                 |
| SO2      | Sulfur dioxide (SO <sub>2</sub> )                     | ppmV                 |
| SULF     | Sulfate aerosols                                      | ppmV                 |
| C2O3     | Ketoalcoxy radicals (C <sub>2</sub> O <sub>3</sub> )  | ppmV                 |
| MEO2     | Methoxy radicals (MEO <sub>2</sub> )                  | ppmV                 |
| RO2      | Alkylperoxy radicals (RO <sub>2</sub> )               | ppmV                 |
| PAN      | Peroxyacetyl nitrates (PAN)                           | ppmV                 |
| PACD     | Peroxy carboxylic acids (PACD)                        | ppmV                 |
| AACD     | Peroxy acyl aldehydes (AACD)                          | ppmV                 |
| CXO3     | Ketoalkylperoxy radicals (CXO <sub>3</sub> )          | ppmV                 |
| ALD2     | Acetaldehyde (ALD <sub>2</sub> )                      | ppmV                 |
| XO2H     | Alkylperoxy hydroperoxides (XO <sub>2</sub> H)        | ppmV                 |
| PANX     | Alkyl peroxy nitrates (PANX)                          | ppmV                 |
| FORM     | Formaldehyde (FORM)                                   | ppmV                 |
| MEPX     | Methoxyperoxy radicals (MEPX)                         | ppmV                 |
| MEOH     | Methanol (MEOH)                                       | ppmV                 |
| ROOH     | Alkyl hydroperoxides (ROOH)                           | ppmV                 |
| XO2      | Alkylperoxy radicals (XO <sub>2</sub> )               | ppmV                 |
| XO2N     | Alkylperoxy nitrate radicals (XO <sub>2</sub> N)      | ppmV                 |
| XPAR     | Alkylperoxy alkyl radicals (XPAR)                     | ppmV                 |
| XPRP     | Alkylperoxy propionyl radicals (XPRP)                 | ppmV                 |
| NTR1     | Organic nitrogen oxides (NTR1)                        | ppmV                 |
| NTR2     | Organic nitrogen oxides (NTR2)                        | ppmV                 |

|          |                                           |      |
|----------|-------------------------------------------|------|
| FACD     | Acetylperoxy radical (FACD)               | ppmV |
| CO       | Carbon monoxide (CO)                      | ppmV |
| HCO3     | Bicarbonate ion (HCO3)                    | ppmV |
| ALDX     | Aldehydes (ALDX)                          | ppmV |
| GLYD     | Glycolaldehyde (GLYD)                     | ppmV |
| GLY      | Glycol (GLY)                              | ppmV |
| MGLY     | Methylglyoxal (MGLY)                      | ppmV |
| ETHA     | Ethane (ETHA)                             | ppmV |
| ETOH     | Ethanol (ETOH)                            | ppmV |
| KET      | Ketones (KET)                             | ppmV |
| PAR      | Hydrocarbons                              | ppmV |
| ACET     | Acetaldehyde                              | ppmV |
| PRPA     | Propane                                   | ppmV |
| ROR      | ROR                                       | ppmV |
| ETHY     | Ethylene                                  | ppmV |
| ETH      | Ethane                                    | ppmV |
| OLE      | Olefins                                   | ppmV |
| IOLE     | Iso-olefins                               | ppmV |
| ISOP     | Isoprene                                  | ppmV |
| ISO2     | ISO2                                      | ppmV |
| ISPD     | Isoprene-derived peroxy radicals          | ppmV |
| INTR     | Intramolecular H-shifted peroxy radicals  | ppmV |
| ISPX     | Isoprene-derived peroxy carbonyl radicals | ppmV |
| HPLD     | Hydroperoxyl radicals                     | ppmV |
| OPO3     | Oxygenated organic peroxy radicals        | ppmV |
| EPOX     | Epoxides                                  | ppmV |
| IEPOXP   | IEPOXP                                    | ppmV |
| EPX2     | EPX2                                      | ppmV |
| TERP     | Terpenes                                  | ppmV |
| APIN     | Alpha-pinene                              | ppmV |
| TERPNRO2 | Total terpene-derived organic nitrates    | ppmV |
| MTNO3    | Methyl nitrates                           | ppmV |
| BENZENE  | Benzene                                   | ppmV |
| CRES     | Cresols                                   | ppmV |
| BZO2     | Benzoate peroxy radicals                  | ppmV |
| OPEN     | Other peroxy radicals                     | ppmV |
| BENZRO2  | Benzyl peroxy radicals                    | ppmV |
| TOL      | Toluene                                   | ppmV |
| TO2      | Toluene peroxy radicals                   | ppmV |
| TOLRO2   | Toluene-derived peroxy radicals           | ppmV |
| XOPN     | Other peroxy alkyl nitrates               | ppmV |

|                  |                                                         |      |
|------------------|---------------------------------------------------------|------|
| XYLMN            | Xylene-derived peroxy alkyl nitrates                    | ppmV |
| XLO2             | Other peroxy alkoxy radicals                            | ppmV |
| XYLRO2           | Xylene-derived peroxy alkoxy radicals                   | ppmV |
| NAPH             | Naphthalene                                             | ppmV |
| PAHRO2           | PAH peroxy radicals                                     | ppmV |
| CRO              | CRO                                                     | ppmV |
| CAT1             | CAT1                                                    | ppmV |
| CRON             | CRON                                                    | ppmV |
| OPAN             | Organic peroxyacyl nitrates                             | ppmV |
| ECH4             | Ethane and methane                                      | ppmV |
| CL2              | Chlorine gas                                            | ppmV |
| CL               | Atomic chlorine                                         | ppmV |
| HOCL             | Hypochlorous acid                                       | ppmV |
| CLO              | Chlorine monoxide                                       | ppmV |
| FMCL             | Free molecular chlorine                                 | ppmV |
| HCL              | Hydrogen chloride                                       | ppmV |
| CLNO2            | Chlorine nitrate                                        | ppmV |
| CLNO3            | Chlorine nitrate                                        | ppmV |
| SESQ             | SESQ                                                    | ppmV |
| SOAALK           | Secondary organic aerosol from anthropogenic precursors | ppmV |
| H2NO3PIJ         | HNO3(H2O) and HNO4 primary inorganic aerosols           | ppmV |
| H2NO3PK          | HNO3(H2O) and HNO4 primary inorganic aerosols           | ppmV |
| VLVPO1           | Very low-volatility primary organic aerosol mode 1      | ppmV |
| VSVPO1           | Very semi-volatile primary organic aerosol mode 1       | ppmV |
| VSVPO2           | Very semi-volatile primary organic aerosol mode 2       | ppmV |
| VSVPO3           | Very semi-volatile primary organic aerosol mode 3       | ppmV |
| VIVPO1           | Very insoluble primary organic aerosol mode 1           | ppmV |
| VLVOO1           | Very low-volatility oxygenated organic aerosol mode 1   | ppmV |
| VLVOO2           | Very low-volatility oxygenated organic aerosol mode 2   | ppmV |
| VSVOO1           | Very semi-volatile oxygenated organic aerosol mode 1    | ppmV |
| VSVOO2           | Very semi-volatile oxygenated organic aerosol mode 2    | ppmV |
| VSVOO3           | Very semi-volatile oxygenated organic aerosol mode 3    | ppmV |
| PCVOC            | Primary carbonaceous volatile organic compounds         | ppmV |
| FORM_PRIM<br>ARY | Primary formaldehyde                                    | ppmV |
| ALD2_PRIMA<br>RY | Primary acetaldehyde                                    | ppmV |
| BUTADIENE1<br>3  | 1                                                       | ppmV |
| ACROLEIN         | Acrolein                                                | ppmV |
| ACRO_PRIMA<br>RY | Primary acrolein                                        | ppmV |
| TOLU             | Toluene                                                 | ppmV |

|          |                                                             |        |
|----------|-------------------------------------------------------------|--------|
| HG       | Mercury                                                     | ppmV   |
| HGIIGAS  | Mercury gas phase                                           | ppmV   |
| SVAVB1   | Sem                                                         | ppmV   |
| SVAVB2   | Secondary organic aerosol from biogenic precursors (mode 2) | ppmV   |
| SVAVB3   | Secondary organic aerosol from biogenic precursors (mode 3) | ppmV   |
| SVAVB4   | Secondary organic aerosol from biogenic precursors (mode 4) | ppmV   |
| ASO4J    | Ammonium sulfate (j mode)                                   | ug m-3 |
| ASO4I    | Ammonium sulfate (i mode)                                   | ug m-3 |
| ANH4J    | Ammonium nitrate (j mode)                                   | ug m-3 |
| ANH4I    | Ammonium nitrate (i mode)                                   | ug m-3 |
| ANO3J    | Nitrate aerosol (j mode)                                    | ug m-3 |
| ANO3I    | Nitrate aerosol (i mode)                                    | ug m-3 |
| AISO1J   | Isoprene secondary organic aerosol (j mode)                 | ug m-3 |
| AISO2J   | Isoprene secondary organic aerosol (j mode)                 | ug m-3 |
| ASQTJ    | SQT                                                         | ug m-3 |
| AORGCJ   | Primary organic carbon aerosol (j mode)                     | ug m-3 |
| AECJ     | Elemental carbon aerosol (j mode)                           | ug m-3 |
| AECI     | Elemental carbon aerosol (i mode)                           | ug m-3 |
| AOTH RJ  | Other organic aerosol (j mode)                              | ug m-3 |
| AOTH RI  | Other organic aerosol (i mode)                              | ug m-3 |
| AFEJ     | Fine soil aerosol emissions (j mode)                        | ug m-3 |
| AALJ     | Aluminum aerosol (j mode)                                   | ug m-3 |
| ASIJ     | Silicon aerosol (j mode)                                    | ug m-3 |
| ATIJ     | Titanium aerosol (j mode)                                   | ug m-3 |
| ACAJ     | Cadmium aerosol (j mode)                                    | ug m-3 |
| AMGJ     | Magnesium aerosol (j mode)                                  | ug m-3 |
| AKJ      | Potassium aerosol (j mode)                                  | ug m-3 |
| AMNJ     | Manganese aerosol (j mode)                                  | ug m-3 |
| ACORS    | Copper aerosol (surface)                                    | ug m-3 |
| ASOIL    | Soil aerosol (surface)                                      | ug m-3 |
| NUMATKN  | Number concentration of aerosol ammonium sulfate            | m-3    |
| NUMACC   | Number concentration of aerosol ammonium chloride           | m-3    |
| NUMCOR   | Number concentration of aerosol coarse mode                 | m-3    |
| SRFATKN  | Surface area concentration of aerosol ammonium sulfate      | m2 m-3 |
| SRFACC   | Surface area concentration of aerosol ammonium chloride     | m2 m-3 |
| SRFCOR   | Surface area concentration of aerosol coarse mode           | m2 m-3 |
| AORGH2OJ | Primary organic carbon aerosol in ambient air (j mode)      | ug m-3 |
| AH2OJ    | Water in primary organic carbon aerosol (j mode)            | ug m-3 |
| AH2OI    | Water in primary organic carbon aerosol (i mode)            | ug m-3 |
| AH3OPJ   | Hydrogen in organic peroxide aerosol (j mode)               | ug m-3 |
| AH3OPI   | Hydrogen in organic peroxide aerosol (i mode)               | ug m-3 |

|         |                                                                                 |        |
|---------|---------------------------------------------------------------------------------|--------|
| ANAJ    | Ammonium aerosol (j mode)                                                       | ug m-3 |
| ANAI    | Ammonium aerosol (i mode)                                                       | ug m-3 |
| ACLJ    | Chloride aerosol (j mode)                                                       | ug m-3 |
| ACLI    | Chloride aerosol (i mode)                                                       | ug m-3 |
| ASEACAT | Sea salt aerosol inactivation by clouds                                         | ug m-3 |
| ACLK    | Chloride aerosol inactivation by clouds                                         | ug m-3 |
| ASO4K   | Ammonium sulfate aerosol inactivation by clouds                                 | ug m-3 |
| ANH4K   | Ammonium nitrate aerosol inactivation by clouds                                 | ug m-3 |
| ANO3K   | Nitrate aerosol inactivation by clouds                                          | ug m-3 |
| AH2OK   | Water in organic aerosol (k mode)                                               | ug m-3 |
| AH3OPK  | Hydrogen in organic peroxide aerosol (k mode)                                   | ug m-3 |
| AISO3J  | Isoprene-derived secondary organic aerosol (j mode)                             | ug m-3 |
| AOLGAJ  | Primary organic aerosol from light-duty gasoline vehicles (j mode)              | ug m-3 |
| AOLGBJ  | Primary organic aerosol from light-duty gasoline vehicles (j mode)              | ug m-3 |
| AGLYJ   | Glyoxal aerosol (j mode)                                                        | ug m-3 |
| AMTNO3J | Methyl nitrate aerosol (j mode)                                                 | ug m-3 |
| AMTHYDJ | Methylglyoxal aerosol (j mode)                                                  | ug m-3 |
| APOCI   | Primary organic carbon aerosol from isoprene                                    | ug m-3 |
| APOCJ   | Primary organic carbon aerosol (j mode)                                         | ug m-3 |
| APNCOMI | Primary organic carbon aerosol from anthropogenic non-methane organic compounds | ug m-3 |
| APNCOMJ | Primary organic carbon aerosol (j mode)                                         | ug m-3 |
| APCSOJ  | Primary organic carbon aerosol from cooking and bioparticles (j mode)           | ug m-3 |
| ALVPO1I | Very low-volatility primary organic aerosol mode 1 (i mode)                     | ug m-3 |
| ASVPO1I | Very semi-volatile primary organic aerosol mode 1 (i mode)                      | ug m-3 |
| ASVPO2I | Very semi-volatile primary organic aerosol mode 2 (i mode)                      | ug m-3 |
| ALVPO1J | Very low-volatility primary organic aerosol mode 1 (j mode)                     | ug m-3 |
| ASVPO1J | Very semi-volatile primary organic aerosol mode 1 (j mode)                      | ug m-3 |
| ASVPO2J | Very semi-volatile primary organic aerosol mode 2 (j mode)                      | ug m-3 |
| ASVPO3J | Very semi-volatile primary organic aerosol mode 3 (j mode)                      | ug m-3 |
| AIVPO1J | Very insoluble primary organic aerosol mode 1 (j mode)                          | ug m-3 |
| ALVOO1I | Very low-volatility oxygenated organic aerosol mode 1 (i mode)                  | ug m-3 |
| ALVOO2I | Very low-volatility oxygenated organic aerosol mode 2 (i mode)                  | ug m-3 |
| ASVOO1I | Very semi-volatile oxygenated organic aerosol mode 1 (i mode)                   | ug m-3 |
| ASVOO2I | Very semi-volatile oxygenated organic aerosol mode 2 (i mode)                   | ug m-3 |
| ALVOO1J | Very low-volatility oxygenated organic aerosol mode 1 (j mode)                  | ug m-3 |
| ALVOO2J | Very low-volatility oxygenated organic aerosol mode 2 (j mode)                  | ug m-3 |
| ASVOO1J | Very semi-volatile oxygenated organic aerosol mode 1 (j mode)                   | ug m-3 |
| ASVOO2J | Very semi-volatile oxygenated organic aerosol mode 2 (j mode)                   | ug m-3 |
| ASVOO3J | Very semi-volatile oxygenated organic aerosol mode 3 (j mode)                   | ug m-3 |
| AAVB1J  | Alkylbenzenes from light-duty gasoline vehicles (j mode)                        | ug m-3 |

|         |                                                          |        |
|---------|----------------------------------------------------------|--------|
| AAVB2J  | Alkylbenzenes from light-duty gasoline vehicles (j mode) | ug m-3 |
| AAVB3J  | Alkylbenzenes from light-duty gasoline vehicles (j mode) | ug m-3 |
| AAVB4J  | Alkylbenzenes from light-duty gasoline vehicles (j mode) | ug m-3 |
| AMT1J   | Monoterpenes (j mode)                                    | ug m-3 |
| AMT2J   | Monoterpenes (j mode)                                    | ug m-3 |
| AMT3J   | Monoterpenes (j mode)                                    | ug m-3 |
| AMT4J   | Monoterpenes (j mode)                                    | ug m-3 |
| AMT5J   | Monoterpenes (j mode)                                    | ug m-3 |
| AMT6J   | Monoterpenes (j mode)                                    | ug m-3 |
| NH3     | Ammonia                                                  | ppmV   |
| SVISO1  | ISOPOOH-derived secondary organic aerosol                | ppmV   |
| SVISO2  | ISOPOOH-derived secondary organic aerosol                | ppmV   |
| SVSQT   | SQT-derived secondary organic aerosol                    | ppmV   |
| LVPCSOG | Large-scale primary carbonaceous soluble organic gases   | ppmV   |
| SVMT1   | Methane-derived secondary organic aerosol                | ppmV   |
| SVMT2   | Methane-derived secondary organic aerosol                | ppmV   |
| SVMT3   | Methane-derived secondary organic aerosol                | ppmV   |
| SVMT4   | Methane-derived secondary organic aerosol                | ppmV   |
| SVMT5   | Methane-derived secondary organic aerosol                | ppmV   |
| SVMT6   | Methane-derived secondary organic aerosol                | ppmV   |
| RH      | Relative humidity                                        | 1      |
| TA      | Ambient temperature                                      | K      |
| PRES    | Pressure                                                 | Pa     |
