# Supplementary material for: Brazilian Atmospheric Inventories – BRAIN: A comprehensive database of air quality in Brazil
Source: Copernicus journal article supplement (doi:10.5194/essd-2023-305), 2023-10-05
Supplement: Supplementary file 4 [file essd-2023-305-supplement.zip]

## Supplementary Material 14

Line plots with modeled and observed timeseries for all monitoring stations considering monthly averages, hourly averages, and raw data.

Link to access the figures: <https://brain.ens.ufsc.br/CMAQ/figures/line/>

Each image is named as follows:

Line\_[pollutant1]\_[pollutant2]\_[station code]\_[station name].png

Line is a type of graph, which is a line graph.

[pollutant1] and [pollutant2] were the pollutants compared.

[Station code] is the station code for the air quality monitoring station.

The station code is composed of state abbreviations, the first two letters of the city name, and station number.

[Station name] is the name of the air quality monitoring station.

.png is the file format, which is the PNG file.

Each image shows three lines:

The first line compares the simulated and measured monthly average pollutant concentration.

The second line compares the simulated and measured hourly average pollutant concentration.

The third line compares the raw concentration data for the simulated and measured pollutants.
