# Supplementary material for: Brazilian Atmospheric Inventories – BRAIN: A comprehensive database of air quality in Brazil
Source: Copernicus journal article supplement (doi:10.5194/essd-2023-305), 2023-10-05
Supplement: Supplementary file 5 [file essd-2023-305-supplement.zip]

Archive with 14 entries (14 files):
- SM2.pdf
- SM3.pdf
- SM4.pdf
- SM5.pdf
- SM6.pdf
- SM7.zip
- SM8.zip
- SM9.pdf
- SM10.zip
- SM11.zip
- SM13.zip
- SM1.pdf
- SM12.pdf
- SM14.pdf
