# Supplementary material for: Brazilian Atmospheric Inventories – BRAIN: A comprehensive database of air quality in Brazil
Source: Copernicus journal article supplement (doi:10.5194/essd-2023-305), 2023-10-05
Supplement: Supplementary file 5 [file essd-2023-305-supplement.zip › SM3.pdf]

```

&time_control
run_days           = 0,
run_hours          = 30,
run_minutes        = 0,
run_seconds        = 0,
start_year         = 2019,2019,
start_month        = 01,01,
start_day          = 01,01,
start_hour         = 18, 18,
end_year           = 2019,2019,
end_month          = 01,01,
end_day            = 03,03,
end_hour           = 00, 00,
interval_seconds   = 21600
input_from_file    = .true.,.true.,
history_interval   = 60, 60,
frames_per_outfile = 5000, 5000,
restart            = .false.,
restart_interval   = 10080,
auxinput5_interval_m = 60,
io_form_auxinput2  = 2,
io_form_auxinput5  = 0,
io_form_history    = 2,
io_form_restart    = 2,
io_form_input      = 2,
io_form_boundary   = 2,
debug_level        = 0,
/

```

```

&domains
time_step          = 50,
time_step_fract_num = 0,
time_step_fract_den = 1,
max_dom            = 2,
e_we               = 260, 236,
e_sn               = 250, 246,
e_vert            = 33, 33,
p_top_requested    = 5000,
num_metgrid_levels = 34,
vert_refine_fact   = 1,
num_metgrid_soil_levels = 4,
dx                = 20000, 4000,
dy                = 20000, 4000,
grid_id            = 1, 2,
parent_id          = 1, 1,
i_parent_start     = 1, 125,
j_parent_start     = 1, 30,
parent_grid_ratio   = 1, 5,
parent_time_step_ratio = 1, 5,
feedback           = 1,
smooth_option      = 0,
smooth_cg_topo     = .true.,
/

```

```

&physics
mp_physics         = 10, 10,
ra_lw_physics      = 1, 1,
ra_sw_physics      = 1, 1,

```

```

radt                      = 10,          10,
sf_sfclay_physics         = 1,          1,
sf_surface_physics        = 2,          2,
bl_pbl_physics            = 1,          1,
bldt                      = 0,          0,
cu_physics                 = 1,          1,
cudt                      = 5,          5,
isfflx                    = 1,
ifsnw                     = 0,
icloud                    = 1,
surface_input_source      = 1,
num_soil_layers           = 4,
num_land_cat              = 21,
sf_urban_physics          = 0,          0,
/

&fdda
/

&dynamics
w_damping                 = 1,
diff_opt                  = 1,          1,
km_opt                    = 4,          4,
diff_6th_opt              = 0,          0,
diff_6th_factor           = 0.12,      0.12,
base_temp                 = 290.,
damp_opt                  = 0,
zdamp                     = 5000,      5000,
dampcoef                  = 0.2,        0.2,
khdif                    = 0,          0,
kvdif                    = 0,          0,
epssm                    = 0.2,
non_hydrostatic           = .true.,    .true.,
moist_adv_opt             = 1,          1,
scalar_adv_opt            = 1,          1,
/

&bdy_control
spec_bdy_width            = 5,
spec_zone                 = 1,
relax_zone                = 4,
specified                 = .true.,    .false.,
nested                   = .false.,    .true.,
/

&grib2
/

&namelist_quilt
nio_tasks_per_group       = 0,
nio_groups                = 1,
/

```
