# Supplementary material for: Brazilian Atmospheric Inventories – BRAIN: A comprehensive database of air quality in Brazil
Source: Copernicus journal article supplement (doi:10.5194/essd-2023-305), 2023-10-05
Supplement: Supplementary file 5 [file essd-2023-305-supplement.zip › SM4.pdf]

## Supplementary Material 4

**Table SM4.** Details of WRF outputs.

| Variable             | Description                                     | Unit         |
|----------------------|-------------------------------------------------|--------------|
| Times                | Time information of the model output.           |              |
| XLAT                 | Latitude values at the mass grid points.        | degree_north |
| XLONG                | Longitude values at the mass grid points.       | degree_east  |
| LU_INDEX             | Land use category index.                        |              |
| ZNU                  | Full sigma vertical coordinate values.          |              |
| ZNW                  | Half sigma vertical coordinate values.          |              |
| ZS                   | Surface heights.                                | m            |
| DZS                  | Layer thickness at the interfaces.              | m            |
| VAR_SSO              | VAR_SSO (used for coupled runs).                | m2           |
| U                    | Zonal wind component.                           | m s-1        |
| V                    | Meridional wind component.                      | m s-1        |
| W                    | Vertical wind component.                        | m s-1        |
| PH                   | Perturbation geopotential.                      | m2 s-2       |
| PHB                  | Base-state geopotential.                        | m2 s-2       |
| T                    | Perturbation potential temperature.             | K            |
| THM                  | Moist potential temperature.                    | K            |
| HFX_FORCE            | Surface sensible heat flux forcing.             | W m-2        |
| LH_FORCE             | Surface latent heat flux forcing.               | W m-2        |
| TSK_FORCE            | Skin temperature forcing.                       | W m-2        |
| HFX_FORCE_TEND       | Tendency of surface sensible heat flux forcing. | W m-2 s-1    |
| LH_FORCE_TEND        | Tendency of surface latent heat flux forcing.   | W m-2 s-1    |
| TSK_FORCE_TEND       | Tendency of skin temperature forcing.           | W m-2 s-1    |
| MU                   | Perturbation dry air mass.                      | Pa           |
| MUB                  | Base-state dry air mass.                        | Pa           |
| NEST_POS             | Nest position.                                  | -            |
| P                    | Perturbation pressure.                          | Pa           |
| PB                   | Base-state pressure.                            | Pa           |
| FNM                  | Sigma coordinate vertical velocity.             |              |
| FNPN                 | Pressure coordinate vertical velocity.          |              |
| RDNW                 | Downward shortwave radiation flux.              |              |
| RDN                  | Net downward shortwave radiation flux.          |              |
| DNW                  | Downward longwave radiation flux.               |              |
| DN                   | Net downward longwave radiation flux.           |              |
| CFN                  | Convective precipitation flux.                  |              |
| CFN1                 | Convective precipitation flux at model levels.  |              |
| THIS_IS_AN_IDEAL_RUN | Flag indicating if it's an idealized run.       | -            |

|           |                                                           |                                      |
|-----------|-----------------------------------------------------------|--------------------------------------|
| P_HYD     | Perturbation hydrostatic pressure.                        | Pa                                   |
| Q2        | Perturbation specific humidity at 2 meters.               | kg kg-1                              |
| T2        | Perturbation temperature at 2 meters.                     | K                                    |
| TH2       | Perturbation potential temperature at 2 meters.           | K                                    |
| PSFC      | Surface pressure.                                         | Pa                                   |
| U10       | Zonal wind component at 10 meters.                        | m s-1                                |
| V10       | Meridional wind component at 10 meters.                   | m s-1                                |
| RDX       | Grid spacing in the x-direction.                          |                                      |
| RDY       | Grid spacing in the y-direction.                          |                                      |
| RESM      | Grid spacing in meters.                                   |                                      |
| ZETATOP   | Model topography height.                                  |                                      |
| CF1       | Flag indicating convective precipitation at model levels. |                                      |
| CF2       | Flag indicating stratiform precipitation at model levels. |                                      |
| CF3       | Flag indicating grid-scale precipitation at model levels. |                                      |
| ITIMESTEP | Current time step.                                        |                                      |
| XTIME     | Simulation time in seconds.                               | minutes since 2019-03-23<br>18:00:00 |
| QVAPOR    | Water vapor mixing ratio.                                 | kg kg-1                              |
| QCLOUD    | Cloud water mixing ratio.                                 | kg kg-1                              |
| QRAIN     | Rainwater mixing ratio.                                   | kg kg-1                              |
| QICE      | Ice mixing ratio.                                         | kg kg-1                              |
| QSNOW     | Snow mixing ratio.                                        | kg kg-1                              |
| QGRAUP    | Graupel mixing ratio.                                     | kg kg-1                              |
| QNICE     | Non-precipitating ice mixing ratio.                       | kg-1                                 |
| QNSNOW    | Non-precipitating snow mixing ratio.                      | kg(-1)                               |
| QNRain    | Non-precipitating rain mixing ratio.                      | kg(-1)                               |
| QNGRAUPEL | Non-precipitating graupel mixing ratio.                   | kg(-1)                               |
| SHDMAX    | Maximum stomatal resistance.                              |                                      |
| SHDMIN    | Minimum stomatal resistance.                              |                                      |
| SNOALB    | Snow albedo.                                              |                                      |
| TSLB      | Soil temperature.                                         | K                                    |
| SMOIS     | Soil moisture content.                                    | m3 m-3                               |
| SH2O      | Liquid soil moisture content.                             | m3 m-3                               |
| SMCREL    | Relative soil moisture content.                           |                                      |
| SEAICE    | Sea-ice fraction.                                         |                                      |
| XICEM     | Sea-ice thickness.                                        |                                      |
| SFROFF    | Surface runoff.                                           | mm                                   |
| UDROFF    | Underground runoff.                                       | mm                                   |
| IVGTYP    | Vegetation type.                                          |                                      |
| ISLTYP    | Soil type.                                                |                                      |
| VEGFRA    | Vegetation fraction.                                      |                                      |

|           |                                                                       |               |
|-----------|-----------------------------------------------------------------------|---------------|
| GRDFLX    | Ground heat flux.                                                     | W m-2         |
| ACGRDFLX  | Accumulated ground heat flux.                                         | J m-2         |
| ACSNOM    | Accumulated snow melt.                                                | kg m-2        |
| SNOW      | Snowfall.                                                             | kg m-2        |
| SNOWH     | Snow depth.                                                           | m             |
| CANWAT    | Canopy water.                                                         | kg m-2        |
| SSTSK     | Sea surface skin temperature.                                         | K             |
| COSZEN    | Cosine of solar zenith angle.                                         | dimensionless |
| LAI       | Leaf area index.                                                      | m-2/m-2       |
| VAR       | Auxiliary variable for nudging.                                       |               |
| MAPFAC_M  | Map scale factor for mass grid.                                       |               |
| MAPFAC_U  | Map scale factor for u-grid.                                          |               |
| MAPFAC_V  | Map scale factor for v-grid.                                          |               |
| MAPFAC_MX | Map scale factor on mass grid in x-direction.                         |               |
| MAPFAC_MY | Map scale factor on mass grid in y-direction.                         |               |
| MAPFAC_UX | Map scale factor on u-grid in x-direction.                            |               |
| MAPFAC_UY | Map scale factor on u-grid in y-direction.                            |               |
| MAPFAC_VX | Map scale factor on v-grid in x-direction.                            |               |
| MF_VX_INV | Inverse of map factor on v-grid in x-direction.                       |               |
| MAPFAC_VY | Map scale factor on v-grid in y-direction.                            |               |
| F         | Coriolis parameter.                                                   | s-1           |
| E         | Vertical coordinate stretching factor.                                | s-1           |
| SINALPHA  | Sine of grid rotation angle.                                          |               |
| COSALPHA  | Cosine of grid rotation angle.                                        |               |
| HGT       | Terrain height.                                                       | m             |
| TSK       | Surface skin temperature.                                             | K             |
| P_TOP     | Model top pressure.                                                   | Pa            |
| T00       | Reference temperature.                                                | K             |
| P00       | Reference pressure.                                                   | Pa            |
| TLP       | Terrain-following hydrostatic pressure.                               |               |
| TISO      | Isobaric temperature.                                                 | K             |
| TLP_STRAT | Terrain-following hydrostatic pressure for stratiform.                | K             |
| P_STRAT   | Perturbation pressure for stratiform.                                 | Pa            |
| MAX_MSTFX | Maximum mixing ratio of surface exchange for momentum in x-direction. |               |
| MAX_MSTFY | Maximum mixing ratio of surface exchange for momentum in y-direction. |               |
| RAINC     | Accumulated convective precipitation.                                 | mm            |
| RAINSH    | Accumulated shallow convective precipitation.                         | mm            |
| RAINNC    | Accumulated non-convective precipitation.                             | mm            |
| SNOWNC    | Accumulated snowfall (non-convective).                                | mm            |
| GRAUPELNC | Accumulated graupel (non-convective).                                 | mm            |

|                       |                                                                      |               |
|-----------------------|----------------------------------------------------------------------|---------------|
| HAILNC                | Accumulated hail (non-convective).                                   | mm            |
| CLDFRA                | Cloud fraction.                                                      |               |
| SWDOWN                | Downward shortwave radiation flux at the surface.                    | W m-2         |
| GLW                   | Downward longwave radiation flux at the surface.                     | W m-2         |
| SWNORM                | Normalized downward shortwave radiation flux at the surface.         | W m-2         |
| OLR                   | Outgoing longwave radiation flux at the top of the atmosphere.       | W m-2         |
| XLAT_U                | Latitude values at u-grid points.                                    | degree_north  |
| XLONG_U               | Longitude values at u-grid points.                                   | degree_east   |
| XLAT_V                | Latitude values at v-grid points.                                    | degree_north  |
| XLONG_V               | Longitude values at v-grid points.                                   | degree_east   |
| ALBEDO                | Surface albedo.                                                      | -             |
| CLAT                  | Cosine of latitude.                                                  | degree_north  |
| ALBBCK                | Background albedo.                                                   |               |
| EMISS                 | Surface emissivity.                                                  |               |
| NOAHRES               | NOAH model restart flag.                                             | W m{-2}       |
| TMN                   | Minimum temperature at the surface.                                  | K             |
| XLAND                 | Land fraction.                                                       |               |
| UST                   | Surface friction velocity.                                           | m s-1         |
| PBLH                  | Planetary boundary layer height.                                     | m             |
| HFX                   | Surface sensible heat flux.                                          | W m-2         |
| QFX                   | Surface latent heat flux.                                            | kg m-2 s-1    |
| LH                    | Surface latent heat flux.                                            | W m-2         |
| ACHFX                 | Accumulated surface sensible heat flux.                              | J m-2         |
| ACLHF                 | Accumulated surface latent heat flux.                                | J m-2         |
| SNOWC                 | Snow cover.                                                          |               |
| SR                    | Soil moisture rating.                                                | -             |
| SAVE_TOPO_FROM_REAL   | Flag indicating if topography is saved from the real data.           | flag          |
| ISEEDARR_SPPT         | Random seed array for SPPT (Shallow Cumulus Scheme).                 |               |
| ISEEDARR_SKEBS        | Random seed array for SKEBS (Stochastic Kinetic Energy Backscatter). |               |
| ISEEDARR_RAND_PERTURB | Random seed array for random perturbations.                          |               |
| ISEEDARRAY_SPP_CONV   | Random seed array for convective perturbations.                      |               |
| ISEEDARRAY_SPP_PBL    | Random seed array for PBL perturbations.                             |               |
| ISEEDARRAY_SPP_LSM    | Random seed array for LSM perturbations.                             |               |
| C1H                   | Land-use category parameter 1 for heat.                              | Dimensionless |
| C2H                   | Land-use category parameter 2 for heat.                              | Pa            |
| C1F                   | Land-use category parameter 1 for moisture.                          | Dimensionless |
| C2F                   | Land-use category parameter 2 for moisture.                          | Pa            |
| C3H                   | Land-use category parameter 3 for heat.                              | Dimensionless |
| C4H                   | Land-use category parameter 4 for heat.                              | Pa            |

|           |                                             |               |
|-----------|---------------------------------------------|---------------|
| C3F       | Land-use category parameter 3 for moisture. | Dimensionless |
| C4F       | Land-use category parameter 4 for moisture. | Pa            |
| PCB       | Perturbation cloud base pressure.           | Pa            |
| PC        | Perturbation cloud top pressure.            | Pa            |
| LANDMASK  | Land-sea mask.                              |               |
| LAKEMASK  | Lake mask.                                  |               |
| SST       | Sea surface temperature.                    | K             |
| SST_INPUT | Input sea surface temperature.              | K             |
