# Supplementary material for: Brazilian Atmospheric Inventories – BRAIN: A comprehensive database of air quality in Brazil
Source: Copernicus journal article supplement (doi:10.5194/essd-2023-305), 2023-10-05
Supplement: Supplementary file 5 [file essd-2023-305-supplement.zip › SM5.pdf]

## Supplementary Material 5

```
# ===== CCTMv5.3.X Run Script =====
# Usage: run.cctm >&! cctm_Bench_2016_12SE1.log &
#
# To report problems or request help with this script/program:
#     http://www.epa.gov/cmaq (EPA CMAQ Website)
#     http://www.cmascenter.org (CMAS Website)
# =====

# =====

#> Runtime Environment Options
# =====

echo 'Start Model Run At ' `date`

#> Toggle Diagnostic Mode which will print verbose information to
#> standard output
setenv CTM_DIAG_LVL 0

#> Choose compiler and set up CMAQ environment with correct
#> libraries using config.cmaq. Options: intel | gcc | pgi
if ( ! $?compiler ) then
    setenv compiler gcc
endif
if ( ! $?compilerVrsn ) then
    setenv compilerVrsn Empty
endif

#> Source the config.cmaq file to set the build environment
cd ../..
```

```
source ./config_cmaq.csh $compiler
```

```
cd CCTM/scripts
```

```
#> Set General Parameters for Configuring the Simulation
```

```
set VRSN    = v532          #> Code Version
```

```
set PROC    = mpi          #> serial or mpi
```

```
set MECH    = cb6r3_ae7_aq  #> Mechanism ID
```

```
set APPL    = BR_2019      #> Application Name (e.g. Gridname)
```

```
#> Define RUNID as any combination of parameters above or others. By default,
```

```
#> this information will be collected into this one string, $RUNID, for easy
```

```
#> referencing in output binaries and log files as well as in other scripts.
```

```
setenv RUNID ${VRSN}_${compilerString}_${APPL}
```

```
#> Set the build directory (this is where the CMAQ executable
```

```
#> is located by default).
```

```
set BLD      = ${CMAQ_HOME}/CCTM/scripts/BLD_CCTM_${VRSN}_${compilerString}
```

```
set EXEC     = CCTM_${VRSN}.exe
```

```
#> Output Each line of Runscript to Log File
```

```
if ( $CTM_DIAG_LVL != 0 ) set echo
```

```
#> Set Working, Input, and Output Directories
```

```
setenv WORKDIR ${CMAQ_HOME}/CCTM/scripts      #> Working Directory. Where the runscript is.
```

```
setenv OUTDIR  ${CMAQ_DATA}/output_CCTM_${RUNID} #> Output Directory
```

```
setenv INPDIR  ${CMAQ_DATA}/inputs/BR_2019     #> Input Directory
```

```
setenv LOGDIR  ${OUTDIR}/LOGS                  #> Log Directory Location
```

```
setenv NMLpath ${BLD}                          #> Location of Namelists. Common places are:
```

```
      #> ${WORKDIR} | ${CCTM_SRC}/MECHS/${MECH} | ${BLD}
```

```
echo ""
```

```
echo "Working Directory is $WORKDIR"
echo "Build Directory is $BLD"
echo "Output Directory is $OUTDIR"
echo "Log Directory is $LOGDIR"
echo "Executable Name is $EXEC"
```

```
# =====
#> CCTM Configuration Options
# =====
```

```
#> Set Start and End Days for looping
setenv NEW_START FALSE      #> Set to FALSE for model restart
set START_DATE = "2019-01-21"  #> beginning date (July 1, 2016)
set END_DATE = "2019-01-22"  #> ending date (July 1, 2016)
```

```
#> Set Timestepping Parameters
set STTIME = 000000      #> beginning GMT time (HHMMSS)
set NSTEPS = 240000      #> time duration (HHMMSS) for this run
set TSTEP = 010000      #> output time step interval (HHMMSS)
```

```
#> Horizontal domain decomposition
if ( $PROC == serial ) then
    setenv NPCOL_NPROW "1 1"; set NPROCS = 1 # single processor setting
else
    @ NPCOL = 7; @ NPROW = 5
    @ NPROCS = $NPCOL * $NPROW
    setenv NPCOL_NPROW "$NPCOL $NPROW";
endif

# @ NPROCS =
```

```

#> Define Execution ID: e.g. [CMAQ-Version-Info]_[User]_[Date]_[Time]

setenv EXECUTION_ID "CMAQ_CCTM${VRSN}_`id -u -n`_`date -u +%Y%m%d_%H%M%S`_%N`" #>
Inform IO/API of the Execution ID

echo ""

echo "---CMAQ EXECUTION ID: $EXECUTION_ID ---"


#> Keep or Delete Existing Output Files

set CLOBBER_DATA = TRUE


#> Logfile Options

#> Master Log File Name; uncomment to write standard output to a log, otherwise write to screen

#setenv LOGFILE $CMAQ_HOME/$RUNID.log

if (! -e $LOGDIR ) then
    mkdir -p $LOGDIR
endif

setenv PRINT_PROC_TIME Y      #> Print timing for all science subprocesses to Logfile
                               #> [ default: TRUE or Y ]

setenv STDOUT T              #> Override I/O-API trying to write information to both the processor
                               #> logs and STDOUT [ options: T | F ]


setenv GRID_NAME BR_2019     #> check GRIDDESC file for GRID_NAME options

setenv GRIDDESC ${CMAQ_HOME}/data/mcip/${APPL}/GRIDDESC #> grid description file


#> Retrieve the number of columns, rows, and layers in this simulation

set NZ = 35

set NX = `grep -A 1 ${GRID_NAME} ${GRIDDESC} | tail -1 | sed 's/ */ /g' | cut -d' ' -f6`
set NY = `grep -A 1 ${GRID_NAME} ${GRIDDESC} | tail -1 | sed 's/ */ /g' | cut -d' ' -f7`
set NCELLS = `echo "${NX} * ${NY} * ${NZ}" | bc -l`


#> Output Species and Layer Options

#> CONC file species; comment or set to 'ALL' to write all species to CONC

```

setenv CONC\_SPCS "ALL"

setenv CONC\_BLEV\_ELEV " 1 1" #> CONC file layer range; comment to write all layers to CONC

#> ACONC file species; comment or set to 'ALL' to write all species to ACONC

setenv AVG\_CONC\_SPCS "O3 NO CO NO2 ASO4I ASO4J NH3 SO2"

setenv ACONC\_BLEV\_ELEV " 1 1" #> ACONC file layer range; comment to write all layers to ACONC

setenv AVG\_FILE\_ENDTIME N #> override default beginning ACONC timestamp [ default: N ]

#### #> Synchronization Time Step and Tolerance Options

setenv CTM\_MAXSYNC 300 #> max sync time step (sec) [ default: 720 ]

setenv CTM\_MINSYNC 60 #> min sync time step (sec) [ default: 60 ]

setenv SIGMA\_SYNC\_TOP 0.7 #> top sigma level thru which sync step determined [ default: 0.7 ]

#setenv ADV\_HDIV\_LIM 0.95 #> maximum horiz. div. limit for adv step adjust [ default: 0.9 ]

setenv CTM\_ADV\_CFL 0.95 #> max CFL [ default: 0.75]

#setenv RB\_ATOL 1.0E-09 #> global ROS3 solver absolute tolerance [ default: 1.0E-07 ]

#### #> Science Options

setenv CTM\_OCEAN\_CHEM Y #> Flag for ocean halogen chemistry and sea spray aerosol emissions [ default: Y ]

setenv CTM\_WB\_DUST N #> use inline windblown dust emissions [ default: Y ]

setenv CTM\_WBDUST\_BELED BELED3 #> landuse database for identifying dust source regions

#> [ default: UNKNOWN ]; ignore if CTM\_WB\_DUST = N

setenv CTM\_LTNG\_NO N #> turn on lightning NOx [ default: N ]

setenv KZMIN Y #> use Min Kz option in edyintb [ default: Y ],

#> otherwise revert to KzOUT

setenv CTM\_MOSAIC N #> landuse specific deposition velocities [ default: N ]

setenv CTM\_FST N #> mosaic method to get land-use specific stomatal flux

#> [ default: N ]

setenv PX\_VERSION Y #> WRF PX LSM

setenv CLM\_VERSION N #> WRF CLM LSM

setenv NOAH\_VERSION N #> WRF NOAH LSM

```

setenv CTM_ABFLUX N      #> ammonia bi-directional flux for in-line deposition
                        #> velocities [ default: N ]

setenv CTM_BIDI_FERT_NH3 N #> subtract fertilizer NH3 from emissions because it will be handled
                        #> by the BiDi calculation [ default: Y ]

setenv CTM_HGBIDI N      #> mercury bi-directional flux for in-line deposition
                        #> velocities [ default: N ]

setenv CTM_SFC_HONO Y     #> surface HONO interaction [ default: Y ]

setenv CTM_GRAV_SETL Y     #> vdiff aerosol gravitational sedimentation [ default: Y ]

setenv CTM_BIOGEMIS N     #> calculate in-line biogenic emissions [ default: N ]

```

#### #> Vertical Extraction Options

```

setenv VERTEXT N

setenv VERTEXT_COORD_PATH ${WORKDIR}/lonlat.csv

```

#### #> I/O Controls

```

setenv IOAPI_LOG_WRITE F  #> turn on excess WRITE3 logging [ options: T | F ]

setenv FL_ERR_STOP N      #> stop on inconsistent input files

setenv PROMPTFLAG F       #> turn on I/O-API PROMPT*FILE interactive mode [ options: T | F ]

setenv IOAPI_OFFSET_64 YES #> support large timestep records (>2GB/timestep record) [ options:
YES | NO ]

setenv IOAPI_CHECK_HEADERS N #> check file headers [ options: Y | N ]

setenv CTM_EMISCHK N      #> Abort CMAQ if missing surrogates from emissions Input files

setenv EMISDIAG N         #> Print Emission Rates at the output time step after they have been
                        #> scaled and modified by the user Rules [options: F | T or 2D | 3D | 2DSUM ]
                        #> Individual streams can be modified using the variables:
                        #>   GR_EMIS_DIAG_## | STK_EMIS_DIAG_## | BIOG_EMIS_DIAG
                        #>   MG_EMIS_DIAG | LTNG_EMIS_DIAG | DUST_EMIS_DIAG
                        #>   SEASPRAY_EMIS_DIAG
                        #> Note that these diagnostics are different than other emissions diagnostic
                        #> output because they occur after scaling.

setenv EMISDIAG_SUM F     #> Print Sum of Emission Rates to Gridded Diagnostic File

```

#> Diagnostic Output Flags

setenv CTM\_CKSUM N      #> checksum report [ default: Y ]

setenv CLD\_DIAG N      #> cloud diagnostic file [ default: N ]

setenv CTM\_PHOTDIAG N    #> photolysis diagnostic file [ default: N ]

setenv NLAYS\_PHOTDIAG "1"    #> Number of layers for PHOTDIAG2 and PHOTDIAG3 from

    #> Layer 1 to NLAYS\_PHOTDIAG [ default: all layers ]

#setenv NWAWE\_PHOTDIAG "294 303 310 316 333 381 607" #> Wavelengths written for variables

    #> in PHOTDIAG2 and PHOTDIAG3

    #> [ default: all wavelengths ]

setenv CTM\_PMDIAG N      #> Instantaneous Aerosol Diagnostic File [ default: Y ]

setenv CTM\_APMDIAG N      #> Hourly-Average Aerosol Diagnostic File [ default: Y ]

setenv APMDIAG\_BLEV\_ELEV "1 1" #> layer range for average pmdiag = NLAYS

setenv CTM\_SSEMDIAG N    #> sea-spray emissions diagnostic file [ default: N ]

setenv CTM\_DUSTEM\_DIAG N    #> windblown dust emissions diagnostic file [ default: N ];

    #> Ignore if CTM\_WB\_DUST = N

setenv CTM\_DEPV\_FILE N    #> deposition velocities diagnostic file [ default: N ]

setenv VDIFF\_DIAG\_FILE N    #> vdiff & possibly aero grav. sedimentation diagnostic file [ default: N ]

setenv LTNGDIAG N      #> lightning diagnostic file [ default: N ]

setenv B3GTS\_DIAG N      #> BEIS mass emissions diagnostic file [ default: N ]

setenv CTM\_WVEL N      #> save derived vertical velocity component to conc

    #> file [ default: Y ]

# =====

#> Input Directories and Filenames

# =====

set ICpath = \${CMAQ\_HOME}/data/icon      #> initial conditions input directory

```

set BCpath = ${CMAQ_HOME}/data/bcon          #> boundary conditions input directory

set EMISpath = $INPDIR  #> gridded emissions input directory

set EMISpath2 = #${INPDIR}/emis/gridded_area/rwc    #> gridded surface residential wood
combustion emissions directory

set IN_PTpath = #${INPDIR}/emis/inln_point          #> point source emissions input directory

set IN_LTpath = #${INPDIR}/lightning                #> lightning NOx input directory

set METpath = ${CMAQ_HOME}/data/mcip/${APPL}        #> meteorology input directory

#set JVALpath = $INPDIR/jproc                      #> offline photolysis rate table directory

set OMIpath = $BLD                                  #> ozone column data for the photolysis model

set LUpath = #${INPDIR}/land                        #> BELD landuse data for windblown dust model

set SZpath = $INPDIR                               #> surf zone file for in-line seaspray emissions


# =====

#> Begin Loop Through Simulation Days

# =====

set rtarray = ""

set TODAYG = ${START_DATE}

set TODAYJ = `date -ud "${START_DATE}" +%Y%j` #> Convert YYYY-MM-DD to YYYYJJJ
set START_DAY = ${TODAYJ}

set STOP_DAY = `date -ud "${END_DATE}" +%Y%j` #> Convert YYYY-MM-DD to YYYYJJJ
set NDAYS = 1

while ($TODAYJ <= $STOP_DAY ) #>Compare dates in terms of YYYYJJJ

set NDAYS = `echo "${NDAYS} + 1" | bc -l`

#> Retrieve Calendar day Information

set YYYYMMDD = `date -ud "${TODAYG}" +%Y%m%d` #> Convert YYYY-MM-DD to YYYYMMDD
set YYYYMM = `date -ud "${TODAYG}" +%Y%m`    #> Convert YYYY-MM-DD to YYYYMM
set YYMMDD = `date -ud "${TODAYG}" +%y%m%d`  #> Convert YYYY-MM-DD to YYMMDD

```

```
set YYYYJJJ = $TODAYJ
```

```
#> Calculate Yesterday's Date
```

```
set YESTERDAY = `date -ud "${TODAYG}-1days" +%Y%m%d` #> Convert YYYY-MM-DD to YYYYJJJ
```

```
# =====
```

```
#> Set Output String and Propagate Model Configuration Documentation
```

```
# =====
```

```
echo ""
```

```
echo "Set up input and output files for Day ${TODAYG}."
```

```
#> set output file name extensions
```

```
setenv CTM_APPL ${RUNID}_${YYYYMMDD}
```

```
#> Copy Model Configuration To Output Folder
```

```
if ( ! -d "$OUTDIR" ) mkdir -p $OUTDIR
```

```
cp $BLD/CCTM_${VRSN}.cfg $OUTDIR/CCTM_${CTM_APPL}.cfg
```

```
# =====
```

```
#> Input Files (Some are Day-Dependent)
```

```
# =====
```

```
#> Initial conditions
```

```
if ($NEW_START == true || $NEW_START == TRUE ) then
```

```
    setenv ICFE ICON_v532_BR_2019_profile_20190101
```

```
    setenv INIT_MEDC_1 notused
```

```
    setenv INITIAL_RUN Y #related to restart soil information file
```

```
else
```

```
    set ICpath = $OUTDIR
```

```
    setenv ICFE CCTM_CGRID_${RUNID}_${YESTERDAY}.nc
```

```
    setenv INIT_MEDC_1 $ICpath/CCTM_MEDIA_CONC_${RUNID}_${YESTERDAY}.nc
```

```
setenv INITIAL_RUN N  
endif
```

```
#> Boundary conditions
```

```
set BCFILE = BCON_v532_BR_2019_profile_20190101
```

```
#> Off-line photolysis rates
```

```
#set JVALfile = JTABLE_${YYYYJJJ}
```

```
#> Ozone column data
```

```
set OMIfile = OMI_1979_to_2019.dat
```

```
#> Optics file
```

```
set OPTfile = PHOT_OPTICS.dat
```

```
#> MCIP meteorology files
```

```
setenv GRID_BDY_2D $METpath/GRIDBDY2D_${APPL}.nc # GRID files are static, not day-specific
```

```
setenv GRID_CRO_2D $METpath/GRIDCRO2D_${APPL}.nc
```

```
setenv GRID_CRO_3D $METpath/GRIDCRO3D_${APPL}.nc
```

```
setenv GRID_DOT_2D $METpath/GRIDDOT2D_${APPL}.nc
```

```
setenv MET_CRO_2D $METpath/METCRO2D_${APPL}.nc
```

```
setenv MET_CRO_3D $METpath/METCRO3D_${APPL}.nc
```

```
setenv MET_DOT_3D $METpath/METDOT3D_${APPL}.nc
```

```
setenv MET_BDY_3D $METpath/METBDY3D_${APPL}.nc
```

```
setenv LUFRAC_CRO $METpath/LUFRAC_CRO_${APPL}.nc
```

```
#> Emissions Control File
```

```
#>
```

```
#> IMPORTANT NOTE
```

```
#>
```

#> The emissions control file defined below is an integral part of controlling the behavior of the model simulation.

#> Among other things, it controls the mapping of species in the emission files to chemical species in the model and

#> several aspects related to the simulation of organic aerosols.

#> Please carefully review the emissions control file to ensure that it is configured to be consistent with the assumptions

#> made when creating the emission files defined below and the desired representation of organic aerosols.

#> For further information, please see:

#> + AERO7 Release Notes section on 'Required emission updates':

#> [https://github.com/USEPA/CMAQ/blob/master/DOCS/Release\\_Notes/aero7\\_overview.md](https://github.com/USEPA/CMAQ/blob/master/DOCS/Release_Notes/aero7_overview.md)

#> + CMAQ User's Guide section 6.9.3 on 'Emission Compatability':

#>

[https://github.com/USEPA/CMAQ/blob/master/DOCS/Users\\_Guide/CMAQ\\_UG\\_ch06\\_model\\_configuration\\_options.md#6.9.3\\_Emission\\_Compatability](https://github.com/USEPA/CMAQ/blob/master/DOCS/Users_Guide/CMAQ_UG_ch06_model_configuration_options.md#6.9.3_Emission_Compatability)

#> + Emission Control (DESID) Documentation in the CMAQ User's Guide:

#>

[https://github.com/USEPA/CMAQ/blob/master/DOCS/Users\\_Guide/Appendix/CMAQ\\_UG\\_appendix B\\_emissions\\_control.md](https://github.com/USEPA/CMAQ/blob/master/DOCS/Users_Guide/Appendix/CMAQ_UG_appendix_B_emissions_control.md)

#>

setenv EMISCTRL\_NML \${BLD}/EmissCtrl\_\${MECH}.nml

#> Spatial Masks For Emissions Scaling

# setenv CMAQ\_MASKS \${EMISpath}/OCEAN #> horizontal grid-dependent surf zone file

#> Gridded Emissions Files

setenv N\_EMIS\_GR 4

set EMISfile = BRAVESout

setenv GR\_EMIS\_001 \${EMISpath}/\${EMISfile}

setenv GR\_EMIS\_LAB\_001 GRIDDED\_EMIS

setenv GR\_EM\_SYM\_DATE\_001 F # To change default behaviour please see Users Guide for EMIS\_SYM\_DATE

```
set EMISfile = FINNout
setenv GR_EMIS_002 ${EMISpath}/${EMISfile}
setenv GR_EMIS_LAB_002 GR_FIRES
setenv GR_EM_SYM_DATE_002 F #
```

```
set EMISfile = MEGANout
setenv GR_EMIS_003 ${EMISpath}/${EMISfile}
setenv GR_EMIS_LAB_003 GRIDDED_BIO
setenv GR_EM_SYM_DATE_003 F #
setenv GR_EMIS_DIAG_003 F
```

```
set EMISfile = INDout
setenv GR_EMIS_004 ${EMISpath}/${EMISfile}
setenv GR_EMIS_LAB_004 GRIDDED_IND
setenv GR_EM_SYM_DATE_004 F #
setenv GR_EMIS_DIAG_004 F
```

```
# set EMISfile = emis_mole_rwc_${YYYYMMDD}_12US1_cmaq_cb6_2016ff_16j.nc
# setenv GR_EMIS_002 ${EMISpath2}/${EMISfile}
# setenv GR_EMIS_LAB_002 GR_RES_FIRES
# setenv GR_EM_SYM_DATE_002 F # To change default behaviour please see Users Guide for
EMIS_SYM_DATE
```

#> In-line point emissions configuration

```
setenv N_EMIS_PT 0    #> Number of elevated source groups
```

```
set STKCASEG = 12US1_2016ff_16j    # Stack Group Version Label
set STKCASEE = 12US1_cmaq_cb6_2016ff_16j # Stack Emission Version Label
```

# Time-Independent Stack Parameters for Inline Point Sources

```
setenv STK_GRPS_001 $IN_PTpath/stack_groups/stack_groups_ptnonipm_${STKCASEG}.nc
setenv STK_GRPS_002 $IN_PTpath/stack_groups/stack_groups_ptegu_${STKCASEG}.nc
setenv STK_GRPS_003 $IN_PTpath/stack_groups/stack_groups_othpt_${STKCASEG}.nc
setenv STK_GRPS_004
$IN_PTpath/stack_groups/stack_groups_ptagfire_${YYYYMMDD}_${STKCASEG}.nc
setenv STK_GRPS_005
$IN_PTpath/stack_groups/stack_groups_ptfire_${YYYYMMDD}_${STKCASEG}.nc
setenv STK_GRPS_006
$IN_PTpath/stack_groups/stack_groups_ptfire_othna_${YYYYMMDD}_${STKCASEG}.nc
setenv STK_GRPS_007 $IN_PTpath/stack_groups/stack_groups_pt_oilgas_${STKCASEG}.nc
setenv STK_GRPS_008 $IN_PTpath/stack_groups/stack_groups_cmv_c3_${STKCASEG}.nc
```

#### # Emission Rates for Inline Point Sources

```
setenv STK_EMIS_001
$IN_PTpath/ptnonipm/inln_mole_ptnonipm_${YYYYMMDD}_${STKCASEE}.nc
setenv STK_EMIS_002 $IN_PTpath/ptegu/inln_mole_ptegu_${YYYYMMDD}_${STKCASEE}.nc
setenv STK_EMIS_003 $IN_PTpath/othpt/inln_mole_othpt_${YYYYMMDD}_${STKCASEE}.nc
setenv STK_EMIS_004 $IN_PTpath/ptagfire/inln_mole_ptagfire_${YYYYMMDD}_${STKCASEE}.nc
setenv STK_EMIS_005 $IN_PTpath/ptfire/inln_mole_ptfire_${YYYYMMDD}_${STKCASEE}.nc
setenv STK_EMIS_006
$IN_PTpath/ptfire_othna/inln_mole_ptfire_othna_${YYYYMMDD}_${STKCASEE}.nc
setenv STK_EMIS_007 $IN_PTpath/pt_oilgas/inln_mole_pt_oilgas_${YYYYMMDD}_${STKCASEE}.nc
setenv STK_EMIS_008 $IN_PTpath/cmv_c3/inln_mole_cmv_c3_${YYYYMMDD}_${STKCASEE}.nc
```

#### # Label Each Emissions Stream

```
setenv STK_EMIS_LAB_001 PT_NONEGU
setenv STK_EMIS_LAB_002 PT_EGU
setenv STK_EMIS_LAB_003 PT_OTHER
setenv STK_EMIS_LAB_004 PT_AGFIRE
setenv STK_EMIS_LAB_005 PT_FIRES
setenv STK_EMIS_LAB_006 PT_OTHFIRE
setenv STK_EMIS_LAB_007 PT_OILGAS
setenv STK_EMIS_LAB_008 PT_CMV
```

# Stack emissions diagnostic files

#setenv STK\_EMIS\_DIAG\_001 2DSUM

#setenv STK\_EMIS\_DIAG\_002 2DSUM

#setenv STK\_EMIS\_DIAG\_003 2DSUM

#setenv STK\_EMIS\_DIAG\_004 2DSUM

#setenv STK\_EMIS\_DIAG\_005 2DSUM

# Allow CMAQ to Use Point Source files with dates that do not

# match the internal model date

# To change default behaviour please see Users Guide for EMIS\_SYM\_DATE

setenv STK\_EM\_SYM\_DATE\_001 T

setenv STK\_EM\_SYM\_DATE\_002 T

setenv STK\_EM\_SYM\_DATE\_003 T

setenv STK\_EM\_SYM\_DATE\_004 T

setenv STK\_EM\_SYM\_DATE\_005 T

setenv STK\_EM\_SYM\_DATE\_006 T

setenv STK\_EM\_SYM\_DATE\_007 T

setenv STK\_EM\_SYM\_DATE\_008 T

#> Lightning NOx configuration

if ( \$CTM\_LTNG\_NO == 'Y' ) then

setenv LTNGNO "Inline" #> set LTNGNO to "Inline" to activate in-line calculation

#> In-line lightning NOx options

setenv USE\_NLDN Y #> use hourly NLDN strike file [ default: Y ]

if ( \$USE\_NLDN == Y ) then

setenv NLDN\_STRIKES \${IN\_LTpath}/NLDN.12US1.\${YYYYMMDD}\_bench.nc

endif

setenv LTNGPARMS\_FILE \${IN\_LTpath}/LTNG\_AllParms\_12US1\_bench.nc #> lightning parameter file

endif

#> In-line biogenic emissions configuration

if ( \$CTM\_BIOGEMIS == 'Y' ) then

set IN\_BEISpath = \${INPDIR}/land

setenv GSPRO \$BLD/gspro\_biogenics.txt

setenv B3GRD \$IN\_BEISpath/b3grd\_bench.nc

setenv BIOSW\_YN Y #> use frost date switch [ default: Y ]

setenv BIOSEASON \$IN\_BEISpath/bioseason.cmaq.2016\_12US1\_full\_bench.ncf

#> ignore season switch file if BIOSW\_YN = N

setenv SUMMER\_YN Y #> Use summer normalized emissions? [ default: Y ]

setenv PX\_VERSION Y #> MCIP is PX version? [ default: N ]

setenv SOILINP \$OUTDIR/CCTM\_SOILOUT\_\${RUNID}\_\${YESTERDAY}.nc

#> Biogenic NO soil input file; ignore if INITIAL\_RUN = Y

endif

#> Windblown dust emissions configuration

if ( \$CTM\_WB\_DUST == 'Y' ) then

# Input variables for BELD3 Landuse option

setenv DUST\_LU\_1 \$LUpath/beld3\_12US1\_459X299\_output\_a\_bench.nc

setenv DUST\_LU\_2 \$LUpath/beld4\_12US1\_459X299\_output\_tot\_bench.nc

endif

#> In-line sea spray emissions configuration

setenv OCEAN\_1 \${EMISpath}/OCEAN #> horizontal grid-dependent surf zone file

#> Bidirectional ammonia configuration

if ( \$CTM\_ABFLUX == 'Y' ) then

setenv E2C\_SOIL \${LUpath}/epic\_festc1.4\_20180516/2016\_US1\_soil\_bench.nc

setenv E2C\_CHEM \${LUpath}/epic\_festc1.4\_20180516/2016\_US1\_time\${YYYYMMDD}\_bench.nc

```

    setenv E2C_CHEM_YEST
    ${LUpath}/epic_festc1.4_20180516/2016_US1_time${YESTERDAY}_bench.nc

    setenv E2C_LU ${LUpath}/beld4_12kmCONUS_2011nlcd_bench.nc

endif

```

#### #> Inline Process Analysis

```

    setenv CTM_PROCAN N    #> use process analysis [ default: N]

    if ( $?CTM_PROCAN ) then  # $CTM_PROCAN is defined

        if ( $CTM_PROCAN == 'Y' || $CTM_PROCAN == 'T' ) then

#> process analysis global column, row and layer ranges

#    setenv PA_BCOL_ECOL "10 90" # default: all columns
#    setenv PA_BROW_EROW "10 80" # default: all rows
#    setenv PA_BLEV_ELEV "1 4" # default: all levels

            setenv PACM_INFILE ${NMLpath}/pa_${MECH}.ctl

            setenv PACM_REPORT $OUTDIR/"PA_REPORT".${YYYYMMDD}

        endif

    endif
endif

```

#### #> Integrated Source Apportionment Method (ISAM) Options

```

setenv CTM_ISAM N

if ( $?CTM_ISAM ) then

    if ( $CTM_ISAM == 'Y' || $CTM_ISAM == 'T' ) then

        setenv SA_IOLIST ${WORKDIR}/isam_control.txt

        setenv ISAM_BLEV_ELEV " 1 1"

        setenv AISAM_BLEV_ELEV " 1 1"

    endif

endif

```

#### #> Set Up ISAM Initial Condition Flags

```

if ($NEW_START == true || $NEW_START == TRUE ) then

    setenv ISAM_NEW_START Y

    setenv ISAM_PREVDAY

else

```

```
setenv ISAM_NEW_START N

setenv ISAM_PREVDAY "$OUTDIR/CCTM_SA_CGRID_${RUNID}_${YESTERDAY}.nc"

endif
```

```
#> Set Up ISAM Output Filenames
```

```
setenv SA_ACONC_1 "$OUTDIR/CCTM_SA_ACONC_${CTM_APPL}.nc -v"
setenv SA_CONC_1 "$OUTDIR/CCTM_SA_CONC_${CTM_APPL}.nc -v"
setenv SA_DD_1 "$OUTDIR/CCTM_SA_DRYDEP_${CTM_APPL}.nc -v"
setenv SA_WD_1 "$OUTDIR/CCTM_SA_WETDEP_${CTM_APPL}.nc -v"
setenv SA_CGRID_1 "$OUTDIR/CCTM_SA_CGRID_${CTM_APPL}.nc -v"
```

```
#> Set optional ISAM regions files
```

```
#setenv ISAM_REGIONS $INPDIR/GRIDMASK_STATES_12SE1.nc
```

```
endif
```

```
endif
```

```
#> Sulfur Tracking Model (STM)
```

```
setenv STM_SO4TRACK N #> sulfur tracking [ default: N ]
```

```
if ( $?STM_SO4TRACK ) then
```

```
if ( $STM_SO4TRACK == 'Y' || $STM_SO4TRACK == 'T' ) then
```

```
#> option to normalize sulfate tracers [ default: Y ]
```

```
setenv STM_ADJSO4 Y
```

```
endif
```

```
endif
```

```
#> CMAQ-DDM-3D
```

```

setenv CTM_DDM3D N

set NPMAX = 1

setenv SEN_INPUT ${WORKDIR}/sensinput.dat


setenv DDM3D_HIGH N # allow higher-order sensitivity parameters [ T | Y | F | N ] (default is N/F)


if ( $NEW_START == true || $NEW_START == TRUE ) then
    setenv DDM3D_RST N # begins from sensitivities from a restart file [ T | Y | F | N ] (default is Y/T)
    set S_ICpath =
    set S_ICfile =
else
    setenv DDM3D_RST Y
    set S_ICpath = $OUTDIR
    set S_ICfile = CCTM_SENGRID_${RUNID}_${YESTERDAY}.nc
endif


setenv DDM3D_BCS F # use sensitivity bc file for nested runs [ T | Y | F | N ] (default is N/F)
set S_BCpath =
set S_BCfile =


setenv CTM_NPMAX $NPMAX
setenv CTM_SENS_1 "$OUTDIR/CCTM_SENGRID_${CTM_APPL}.nc -v"
setenv A_SENS_1 "$OUTDIR/CCTM_ASENS_${CTM_APPL}.nc -v"
setenv CTM_SWETDEP_1 "$OUTDIR/CCTM_SENWDEP_${CTM_APPL}.nc -v"
setenv CTM_SDRYDEP_1 "$OUTDIR/CCTM_SENDDEP_${CTM_APPL}.nc -v"
setenv CTM_NPMAX $NPMAX

if ( $?CTM_DDM3D ) then
    if ( $CTM_DDM3D == 'Y' || $CTM_DDM3D == 'T' ) then
setenv INIT_SENS_1 $S_ICpath/$S_ICfile
setenv BNDY_SENS_1 $S_BCpath/$S_BCfile
    endif

```

endif

# =====

#> Output Files

# =====

#> set output file names

setenv S\_CGRID "\$OUTDIR/CCTM\_CGRID\_\${CTM\_APPL}.nc" #> 3D Inst. Concentrations

setenv CTM\_CONC\_1 "\$OUTDIR/CCTM\_CONC\_\${CTM\_APPL}.nc -v" #> On-Hour  
Concentrations

setenv A\_CONC\_1 "\$OUTDIR/CCTM\_ACONC\_\${CTM\_APPL}.nc -v" #> Hourly Avg.  
Concentrations

setenv MEDIA\_CONC "\$OUTDIR/CCTM\_MEDIA\_CONC\_\${CTM\_APPL}.nc -v" #> NH3 Conc. in  
Media

setenv CTM\_DRY\_DEP\_1 "\$OUTDIR/CCTM\_DRYDEP\_\${CTM\_APPL}.nc -v" #> Hourly Dry  
Deposition

setenv CTM\_DEPV\_DIAG "\$OUTDIR/CCTM\_DEPV\_\${CTM\_APPL}.nc -v" #> Dry Deposition  
Velocities

setenv B3GTS\_S "\$OUTDIR/CCTM\_B3GTS\_S\_\${CTM\_APPL}.nc -v" #> Biogenic Emissions

setenv SOILOUT "\$OUTDIR/CCTM\_SOILOUT\_\${CTM\_APPL}.nc" #> Soil Emissions

setenv CTM\_WET\_DEP\_1 "\$OUTDIR/CCTM\_WETDEP1\_\${CTM\_APPL}.nc -v" #> Wet Dep From All  
Clouds

setenv CTM\_WET\_DEP\_2 "\$OUTDIR/CCTM\_WETDEP2\_\${CTM\_APPL}.nc -v" #> Wet Dep From  
SubGrid Clouds

setenv CTM\_PMDIAG\_1 "\$OUTDIR/CCTM\_PMDIAG\_\${CTM\_APPL}.nc -v" #> On-Hour Particle  
Diagnostics

setenv CTM\_APMDIAG\_1 "\$OUTDIR/CCTM\_APMDIAG\_\${CTM\_APPL}.nc -v" #> Hourly Avg.  
Particle Diagnostics

setenv CTM\_RJ\_1 "\$OUTDIR/CCTM\_PHOTDIAG1\_\${CTM\_APPL}.nc -v" #> 2D Surface Summary  
from Inline Photolysis

setenv CTM\_RJ\_2 "\$OUTDIR/CCTM\_PHOTDIAG2\_\${CTM\_APPL}.nc -v" #> 3D Photolysis Rates

setenv CTM\_RJ\_3 "\$OUTDIR/CCTM\_PHOTDIAG3\_\${CTM\_APPL}.nc -v" #> 3D Optical and  
Radiative Results from Photolysis

setenv CTM\_SSEMIS\_1 "\$OUTDIR/CCTM\_SSEMIS\_\${CTM\_APPL}.nc -v" #> Sea Spray Emissions

setenv CTM\_DUST\_EMIS\_1 "\$OUTDIR/CCTM\_DUSTEMIS\_\${CTM\_APPL}.nc -v" #> Dust Emissions

```

setenv CTM_IPR_1 "$OUTDIR/CCTM_PA_1_${CTM_APPL}.nc -v" #> Process Analysis
setenv CTM_IPR_2 "$OUTDIR/CCTM_PA_2_${CTM_APPL}.nc -v" #> Process Analysis
setenv CTM_IPR_3 "$OUTDIR/CCTM_PA_3_${CTM_APPL}.nc -v" #> Process Analysis
setenv CTM_IRR_1 "$OUTDIR/CCTM_IRR_1_${CTM_APPL}.nc -v" #> Chem Process Analysis
setenv CTM_IRR_2 "$OUTDIR/CCTM_IRR_2_${CTM_APPL}.nc -v" #> Chem Process Analysis
setenv CTM_IRR_3 "$OUTDIR/CCTM_IRR_3_${CTM_APPL}.nc -v" #> Chem Process Analysis
setenv CTM_DRY_DEP_MOS "$OUTDIR/CCTM_DDMOS_${CTM_APPL}.nc -v" #> Dry Dep
setenv CTM_DRY_DEP_FST "$OUTDIR/CCTM_DDFST_${CTM_APPL}.nc -v" #> Dry Dep
setenv CTM_DEPV_MOS "$OUTDIR/CCTM_DEPVMOS_${CTM_APPL}.nc -v" #> Dry Dep Velocity
setenv CTM_DEPV_FST "$OUTDIR/CCTM_DEPVFST_${CTM_APPL}.nc -v" #> Dry Dep Velocity
setenv CTM_VDIFF_DIAG "$OUTDIR/CCTM_VDIFF_DIAG_${CTM_APPL}.nc -v" #> Vertical
Dispersion Diagnostic
setenv CTM_VSED_DIAG "$OUTDIR/CCTM_VSED_DIAG_${CTM_APPL}.nc -v" #> Particle Grav.
Settling Velocity
setenv CTM_LTNGDIAG_1 "$OUTDIR/CCTM_LTNGHRLY_${CTM_APPL}.nc -v" #> Hourly Avg
Lightning NO
setenv CTM_LTNGDIAG_2 "$OUTDIR/CCTM_LTNGCOL_${CTM_APPL}.nc -v" #> Column Total
Lightning NO
setenv CTM_VEXT_1 "$OUTDIR/CCTM_VEXT_${CTM_APPL}.nc -v" #> On-Hour 3D Concs at
select sites

#> set floor file (neg concs)

setenv FLOOR_FILE ${OUTDIR}/FLOOR_${CTM_APPL}.txt

#> look for existing log files and output files
( ls CTM_LOG_???.${CTM_APPL} > buff.txt ) >& /dev/null
( ls ${LOGDIR}/CTM_LOG_???.${CTM_APPL} >> buff.txt ) >& /dev/null
set log_test = `cat buff.txt`; rm -f buff.txt

set OUT_FILES = (${FLOOR_FILE} ${S_CGRID} ${CTM_CONC_1} ${A_CONC_1} ${MEDIA_CONC}
${CTM_DRY_DEP_1} ${CTM_DEPV_DIAG} $B3GTS_S $SOILOUT ${CTM_WET_DEP_1} ${CTM_WET_DEP_2}
${CTM_PMDIAG_1} ${CTM_APMIAG_1} ${CTM_RJ_1} ${CTM_RJ_2} ${CTM_RJ_3} ${CTM_SSEMIS_1}
${CTM_DUST_EMIT_1} ${CTM_IPR_1} ${CTM_IPR_2} ${CTM_IPR_3} ${CTM_IRR_1} ${CTM_IRR_2}

```

```
$CTM_IRR_3 $CTM_DRY_DEP_MOS $CTM_DRY_DEP_FST $CTM_DEPV_MOS $CTM_DEPV_FST  
$CTM_VDIFF_DIAG $CTM_VSED_DIAG $CTM_LTNGDIAG_1 $CTM_LTNGDIAG_2 $CTM_VEXT_1 )
```

```
if ( $?CTM_ISAM ) then
```

```
    if ( $CTM_ISAM == 'Y' || $CTM_ISAM == 'T' ) then
```

```
        set OUT_FILES = ({OUT_FILES} ${SA_ACONC_1} ${SA_CONC_1} ${SA_DD_1} ${SA_WD_1}  
${SA_CGRID_1} )
```

```
    endif
```

```
endif
```

```
if ( $?CTM_DDM3D ) then
```

```
    if ( $CTM_DDM3D == 'Y' || $CTM_DDM3D == 'T' ) then
```

```
        set OUT_FILES = ({OUT_FILES} ${CTM_SENS_1} ${A_SENS_1} ${CTM_SWETDEP_1}  
${CTM_SDRYDEP_1} )
```

```
    endif
```

```
endif
```

```
set OUT_FILES = `echo $OUT_FILES | sed "s; -v;;g" | sed "s;MPI;;;g" `
```

```
( ls $OUT_FILES > buff.txt ) >& /dev/null
```

```
set out_test = `cat buff.txt`; rm -f buff.txt
```

```
#> delete previous output if requested
```

```
if ( $CLOBBER_DATA == true || $CLOBBER_DATA == TRUE ) then
```

```
    echo
```

```
    echo "Existing Logs and Output Files for Day ${TODAYG} Will Be Deleted"
```

```
#> remove previous log files
```

```
foreach file ( ${log_test} )
```

```
    #echo "Deleting log file: $file"
```

```
    /bin/rm -f $file
```

```
end
```

```
#> remove previous output files
```

```
foreach file ( ${out_test} )
```

```
    #echo "Deleting output file: $file"
```

```

/bin/rm -f $file

end

/bin/rm -f ${OUTDIR}/CCTM_EMDIAG*${RUNID}_${YYYYMMDD}.nc

else

#> error if previous log files exist
if ( "$log_test" != "" ) then
    echo "*** Logs exist - run ABORTED ***"
    echo "*** To override, set CLOBBER_DATA = TRUE in run_cctm.csh ***"
    echo "*** and these files will be automatically deleted. ***"
    exit 1
endif

#> error if previous output files exist
if ( "$out_test" != "" ) then
    echo "*** Output Files Exist - run will be ABORTED ***"
    foreach file ( $out_test )
        echo " cannot delete $file"
    end
    echo "*** To override, set CLOBBER_DATA = TRUE in run_cctm.csh ***"
    echo "*** and these files will be automatically deleted. ***"
    exit 1
endif

endif

#> for the run control ...
setenv CTM_STDATE    $YYYYJJJ
setenv CTM_STTIME    $STTIME
setenv CTM_RUNLEN    $NSTEPS
setenv CTM_TSTEP     $TSTEP
setenv INIT_CONC_1 $ICpath/$ICFILE

```

```

setenv BNDY_CONC_1 $BCpath/$BCFILE

setenv OMI $OMIpath/$OMIfile

setenv OPTICS_DATA $OMIpath/$OPTfile

#setenv XJ_DATA $JVALpath/$JVALfile


#> species defn & photolysis

setenv gc_matrix_nml ${NMLpath}/GC_$MECH.nml

setenv ae_matrix_nml ${NMLpath}/AE_$MECH.nml

setenv nr_matrix_nml ${NMLpath}/NR_$MECH.nml

setenv tr_matrix_nml ${NMLpath}/Species_Table_TR_0.nml


#> check for photolysis input data

setenv CSQY_DATA ${NMLpath}/CSQY_DATA_$MECH


if ( ! (-e $CSQY_DATA ) ) then
    echo " $CSQY_DATA  not found "
    exit 1
endif

if ( ! (-e $OPTICS_DATA ) ) then
    echo " $OPTICS_DATA  not found "
    exit 1
endif


# =====

#> Execution Portion

# =====


#> Print attributes of the executable

if ( $CTM_DIAG_LVL != 0 ) then
    ls -l $BLD/$EXEC
    size $BLD/$EXEC

```

```
unlimit
limit
endif
```

```
#> Print Startup Dialogue Information to Standard Out
```

```
echo
```

```
echo "CMAQ Processing of Day $YYYYMMDD Began at `date`"
```

```
echo
```

```
#> Executable call for single PE, uncomment to invoke
```

```
##( /usr/bin/time -p $BLD/$EXEC ) |& tee buff_${EXECUTION_ID}.txt
```

```
#> Executable call for multi PE, configure for your system
```

```
# set MPI = /usr/local/intel/impi/3.2.2.006/bin64
```

```
# set MPIRUN = $MPI/mpirun
```

```
( /usr/bin/time -p mpirun -np $NPROCS $BLD/$EXEC ) |& tee buff_${EXECUTION_ID}.txt
```

```
#> Harvest Timing Output so that it may be reported below
```

```
set rtarray = "${rtarray} `tail -3 buff_${EXECUTION_ID}.txt | grep -Eo '[+-]?[0-9]+([.][0-9]+)?' | head -1` "
```

```
rm -rf buff_${EXECUTION_ID}.txt
```

```
#> Abort script if abnormal termination
```

```
if ( ! -e $OUTDIR/CCTM_CGRID_${CTM_APPL}.nc ) then
```

```
echo
```

```
echo "*****"
```

```
echo "*** Runscript Detected an Error: CGRID file was not written. ***"
```

```
echo "*** This indicates that CMAQ was interrupted or an issue ***"
```

```
echo "*** exists with writing output. The runscript will now ***"
```

```
echo "*** abort rather than proceeding to subsequent days. ***"
```

```
echo "*****"
```

```
break
```

```
endif
```

```
#> Print Concluding Text
```

```
echo
```

```
echo "CMAQ Processing of Day $YYYYMMDD Finished at `date`"
```

```
echo
```

```
echo "\\=====\\=====\\=====\\=====\\\\\\\\=====\\\\\\\\=====\\\\\\\\=====\\\\\\\\"
```

```
echo
```

```
# =====
```

```
#> Finalize Run for This Day and Loop to Next Day
```

```
# =====
```

```
#> Save Log Files and Move on to Next Simulation Day
```

```
mv CTM_LOG_???.${CTM_APPL} $LOGDIR
```

```
if ( $CTM_DIAG_LVL != 0 ) then
```

```
mv CTM_DIAG_???.${CTM_APPL} $LOGDIR
```

```
endif
```

```
#> The next simulation day will, by definition, be a restart
```

```
setenv NEW_START false
```

```
#> Increment both Gregorian and Julian Days
```

```
set TODAYG = `date -ud "${TODAYG}+1days" +%Y-%m-%d` #> Add a day for tomorrow
```

```
set TODAYJ = `date -ud "${TODAYG}" +%Y%j` #> Convert YYYY-MM-DD to YYYYJJJ
```

```
end #Loop to the next Simulation Day
```

```
# =====
```

```
#> Generate Timing Report
```

```

# =====

set RTMTOT = 0

foreach it ( `seq ${NDAYS}` )
    set rt = `echo ${rtarray} | cut -d' ' -f${it}`
    set RTMTOT = `echo "${RTMTOT} + ${rt}" | bc -l`
end

set RTMAVG = `echo "scale=2; ${RTMTOT} / ${NDAYS}" | bc -l`
set RTMTOT = `echo "scale=2; ${RTMTOT} / 1" | bc -l`

echo

echo "=====
echo " ***** CMAQ TIMING REPORT *****
echo "=====
echo "Start Day: ${START_DATE}"
echo "End Day:  ${END_DATE}"
echo "Number of Simulation Days: ${NDAYS}"
echo "Domain Name:      ${GRID_NAME}"
echo "Number of Grid Cells:  ${NCELLS} (ROW x COL x LAY)"
echo "Number of Layers:     ${NZ}"
echo "Number of Processes:   ${NPROCS}"
echo " All times are in seconds."

echo

echo "Num Day    Wall Time"

set d = 0

set day = ${START_DATE}

foreach it ( `seq ${NDAYS}` )
    # Set the right day and format it
    set d = `echo "${d} + 1" | bc -l`
    set n = `printf "%02d" ${d}`

```

```
# Choose the correct time variables

set rt = `echo ${rtarray} | cut -d' ' -f${it}`

# Write out row of timing data

echo "${n}  ${day}  ${rt}"

# Increment day for next loop

set day = `date -ud "${day}+1days" +%Y-%m-%d`

end

echo "  Total Time = ${RTMTOT}"

echo "  Avg. Time = ${RTMAVG}"

exit
```
