# Supplementary material for: Brazilian Atmospheric Inventories – BRAIN: A comprehensive database of air quality in Brazil
Source: Copernicus journal article supplement (doi:10.5194/essd-2023-305), 2023-10-05

## Supplementary Material 9

**Figure SM9.** Spatial distribution of monitoring stations used in the present study. a) Brazil. b) North-East region. c) South-East region. d) South region.

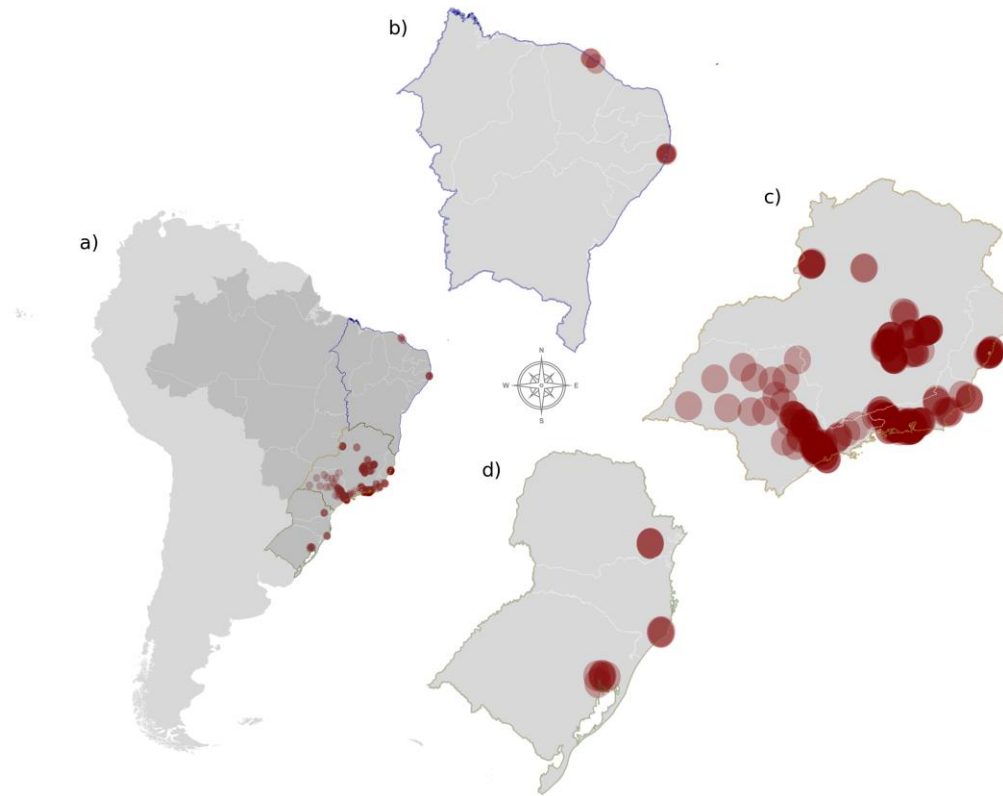

Supplement: Supplementary file 5 [file essd-2023-305-supplement.zip › SM9.pdf]
