# Supplementary material for: Brazilian Atmospheric Inventories – BRAIN: A comprehensive database of air quality in Brazil
Source: Copernicus journal article supplement (doi:10.5194/essd-2023-305), 2023-10-05
Supplement: Supplementary file 5 [file essd-2023-305-supplement.zip › SM12.pdf]

## Supplementary Material 12

Scatter plots comparing BRAIN air quality dataset and observations of each monitoring station.

Link to access the figures: <https://brain.ens.ufsc.br/CMAQ/figures/scatter/>

Each figure is named as follows:

Scatter\_[pollutant1] [pollutant2] [station code]\_[station name].png

The scatter plot is a type of graph.

[pollutant1] and [pollutant2] are the pollutants being compared.

[station code] is the station code for the air quality monitoring station. The station code is composed of the state abbreviation, the first two letters of the city name, and the station number.

[station name] is the name of the air quality monitoring station.

.png is the file format, which is a PNG file.

Each image shows:

The Y-axis contains the data extracted from the CMAQ.

The X-axis contains the data collected by air pollutant monitoring stations.

The white area in the center of the image indicates the 2-factor limits.
