# Supplementary figures and images for: Brazilian Atmospheric Inventories – BRAIN: A comprehensive database of air quality in Brazil
Source: Copernicus journal article supplement (doi:10.5194/essd-2023-305), 2023-10-05

## Supplementary Material 1

**Figure SM1.** Modeling domains.

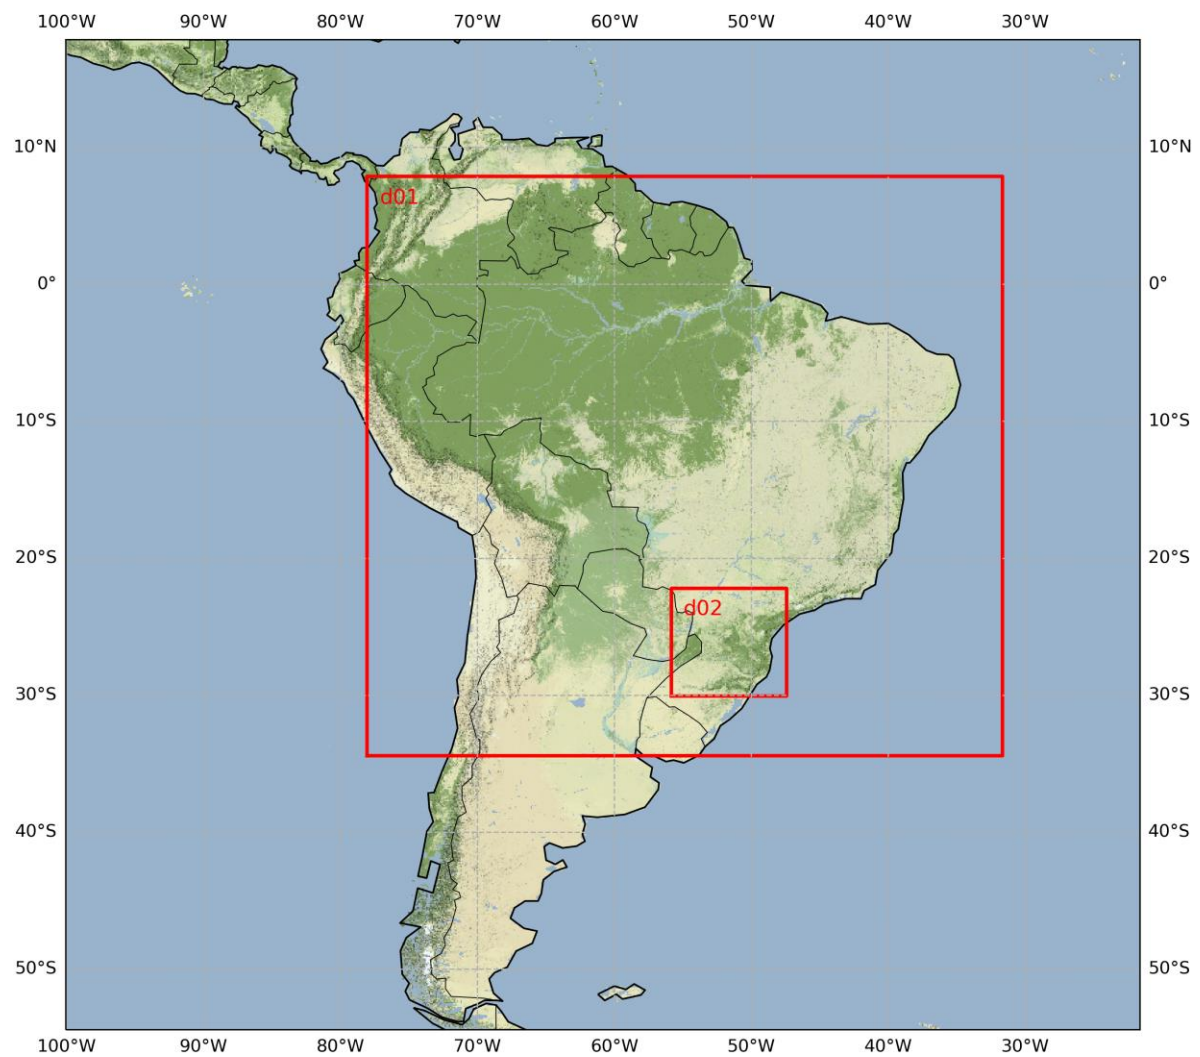

Supplement: Supplementary file 2 [file essd-2023-305-supplement.zip]
